# Supplementary material for: Functional gene diversity and zone-targeted genotype prioritization using trait-diagnostic KASP markers in bread wheat (Triticum aestivum L.)
Source: Research Square preprint supplement (doi:10.21203/rs.3.rs-8710524/v1), 2026-02-20
Supplement: Supplementary file 1 [file 2d7f84b079ad3fb4a0cdff19.docx]

**Table 2** List of KASP-SNP primers used in the study.

| **Trait** | **Gene** | **Forward primer (5 -3') (FAM)** | **Forward primer (5 -3') (HEX)** | **Reverse primer (5'-3')** | **References** |
| --- | --- | --- | --- | --- | --- |
| Plant height | *Rht-B1* | CCCATGGCCATCTCCAGCTG | CCCATGGCCATCTCCAGCTA | TCGGGTACAAGGTGCGGGCG | Ellis et al., 2002 |
|  | *Rht-D1* | CATGGCCATCTCGAGCTGCTC | CATGGCCATCTCGAGCTGCTA | CGGGTACAAGGTGCGCGCC | Ellis et al., 2002 |
| Vernalization | *Vrn-A1* | AGAGTTTTCCAAAAAGATAGATCAATGTAAAT | GAGTTTTCCAAAAAGATAGATCAATGTAAAC | GTTAGTAGTGATGGTCCAATAATGCCAAA | Yan et al., 2004 |
|  | *Vrn-B1* | GGCAGCTAATGTGGGGTAGTCA | GGCAGCTAATGTGGGGTAGTCT | CACAGGCTTTCCTATCATTCGT | Milec et ai., 2012 |
|  | *Vrn-D1* | ATCATTCGAATTGCTAGCTCCGG | ATCATTCGAATTGCTAGCTCCGC | GCCTGAACGCCTAGCCTGTGTA | Fu et al., 2005 |
| Photoperiod sensitivity | *Ppd-D1* | CAAGGAAGTATGAGCAGCGGTT | AAGAGGAAACATGTTGGGGTCC | GCCTCCCACTACACTGGGC | Beales et al., 2007 |
| Pre-harvest sprouting | *PHS1_646* | GGTGGAACAGATGCAACTAAAGG | GGTGGAACAGATGCAACTAAAGA | GTGAGTGTTATATGAAACTAATGATCCATT | Liu et al., 2013 |
|  | *PHS1_666* | GTGAGTGTTATATGAAACTAATGATCCATTT | GTGAGTGTTATATGAAACTAATGATCCATTA | ACCGGGTGGAACAGATGCAACTAAA | Liu et al., 2013 |
|  | *Sdr-B1* | TCAGCAGACTTCGACTCGCA | TCAGCAGACTTCGACTCGCG | AGGATCTCGTTGGCCTTGACG | Zhang et al., 2014b |
|  | *MFT_1617R* | CGTGCATGCAGCCTACGCATACGTA | CGTGCATGCAGCCTACGCATACGTG | TGATCCATGCACGCATCAGCGATCG | Nakamura et al., 2011 |
|  | *MFT_721J* | GTCCTTCCAGAGGCCATGTCG | GTCCTTCCAGAGGCCATGTGC | ACAGGTCAAGCGACACGTAGCC | Lei et al., 2013 |
|  | *VP-1B* | CGCTCTTATATTAGTTTACGGAGGGAG | CTCATTTTGATAGCTCTAGCTAA | CTTCTTCCGAAGTGTATCATATG | Yang et al., 2007 |
|  | *PH2L_SNP* | AGCCCGGAATCCTTCGCA | AGCCCGGAATCCTTCGCG | CGTCAACCTTCTTCACCCTG | Liu et al., 2023 |
|  | *PH4L_SNP* | TGACGATTATTCCAGTGTACAGATA | TGACGATTATTCCAGTGTACAGATG | GCCAAGGACACGATGGTT | Liu et al., 2023 |
|  | *PH5L_SNP* | GCGTACAGCCACACTTGT | GCGTACAGCCACACTTGC | GGTTAAGATGGTGTATCAGAGGAT | Liu et al., 2023 |
|  | *PH6L_SNP* | GTGTGGCTCAATGGGATGACA | GTGTGGCTCAATGGGATGACG | AACCAACCGGCTGCACCATAA | Liu et al., 2023 |
| Drought tolerance | *Dreb-B1* | CCTGCGCACTTTCTTCTTCCTGT | CTGCGCACTTTCTTCTTCCTGG | TTTCACCTTGTGATATGGATTGCCTTGAT | Wei et al., 2009 |
| Leaf rust resistance | *Lr14a* | CTACACTAGTACTACTTTGAGACAATTTTTT | ACACTAGTACTACTTTGAGACAATTTTAA | AACAAACTCCAGTGTAAACACCACAGTTT | Terracciano et al., 2013 |
|  | *Lr34* | GGTATGCCATTTAACATAATCATGAA | GGTATGCCATTTAACATAATCATGAT | TACTATATGGGAGCATTATTTTTTTCC | Neelam et al., 2013 |
|  | *Lr68* | CGTGTCTTGGACCTGAGCAAT | CGTGTCTTGGACCTGAGCAAC | TGACCTGAGTCCCGTCAAGA | Herrera-Fossel et al., 2012 |
| Stripe rust resistance | *Yr15_R8* | CAGATCCCCGGTTCTCTCAAG | CAGATCCCCGGTTCTCTCAAA | CCCCCAAATGATCGAGAATA | Ramirez-Gonzalea et al., 2015 |
|  | *Yr15_R5* | AGTCAACTTGGATTACACTGAAGTT | AGTCAACTTGGATTACACTGAAGTC | AGATATCACACTGAACATACTGATGAG | Ramirez-Gonzalea et al., 2015 |
| Fusarium head blight | *Fhb1* | CACATGCATTTGCAAGGTTGTTATCC | CACATGCATTTGCAAGGTTGTTATCG | CAAAGCAGCCTTAGGTCAATAGTTTGAAA | Bernardo et al., 2012 |
|  | *PFT_KASP* | AGCTGGGAATGAAGGAACCTGC | AGCTGGGAATGAAGGAACCTGT | GTGATTATCTCTCCCATCTTATGTTTGCAA | Singh et al., 2019 |
| Rye translocation | *1BL/1RS* | GGAGCAGGTCCAGATCGCG | CGGAGCAGGTCCAGATCGCA | GAAGCTCCGGTAGATGGAGGCTA | Zeller et al., 1973 |
| Quality | *Glu-A1* | AAGTGTAACTTCTCCGCAACG | ACCTAAGTGTAACTTCTCCGCAACA | CGAAGAAGCTTGGCCTGGATAGTAT | Liu et al., 2008 |
|  | *Glu-D1* | ATAGTATGAAACCTGCTGCGGAG | ATAGTATGAAACCTGCTGCGGAC | TACTAAAAAGGTATTACCCAAGTGTAACTT | Liu et al., 2008 |
| Quality | *Pina-D1* | AACTGCCAACAACTTCGCTA | TTGTCTAGTACCCCGCTCTG | ATGAAGGCCCTCTTCCTCATAGG | Giroux et al., 1997 |
|  | *Pinb-D1* | CTCATGCTCACAGCCGCC | CCTCATGCTCACAGCCGCT | GTCACCTGGCCCACAAAATG | Giroux et al., 1997 |
|  | *Pinb2-B2* | GCACCTAGCAATAAATAAACGGGAG | AGAAAAAAGCCATTAAATAAACGGGAC | TGTTTTGGTGGTGGTGAAGATGA | Chen et al., 2010 |
| Sucrose synthase | *Sus1-7A-1185* | GATTTGATCCATGCCCTCTC | GATTTGATCCATGCCCTCTT | CTGTCGTTCAACATCATTGTCTG | Hou et al., 2014 |
|  | *Sus1-7A-1599* | CGGTATCAGGGTATCCCAACACATTGGA | CGGTATCAGGGTATCCCAACACTTTGTT | ATCCTGTCTCCCCATGGATACTTTGCTC | Hou et al., 2014 |
|  | *Sus1-7B* | CAATTGCTTATGTTCTGTTGTATGG | CAATTGCTTATGTTCTGTTGTACAT | ATGGTTATGCTTGAATGGAAGAGC | Hou et al., 2014 |
|  | *Sus2-2A* | AGCAATGGGGGAGACTGCTGGAGG | AGCAATGGGGGAGACTGCTGGAGA | GCTGTGGATGCGGCTCAGGGCGCG | Hou et al., 2014 |
| Cell wall invertase | *Cwi-4A* | TTTATTTAAAATTTGATGAACTTTTCATAAAC | TTTATTTAAAATTTGATGAACTTTTCACAAAT | CATCGAATTGAAGAAAAGTTCACGC | Jiang et al., 2015 |
| Grain width | *GW2-6A* | GGTCGATGAGATCCCGTACAA | GGTCGATGAGATCCCGTACAG | CGAGCTAGGGTTTGTTGCGAGC | Zhang et al., 2021 |
|  | *GW2-6B* | GTTGGTGTCATTTGTAAAGCCCA | GTTGGTGTCATTTGTAAAGCCCC | AGGCTTGTCAAAACGTGGGGTCC | Qin et al., 2014 |
| Grain weight and length | *GS-D1* | GCCAAGAAATGTCGCTCTCAG | GCCAAGAAATGTCGCTCTCAT | CAAGAATTTTGGGACGGAGGGA | Zhang et al., 2014a |
| Grain weight | *TaSBEIII-A* | ACTGCTCTCCGCCGGTCGGCTGCC | ACTGCTCTCCGCCGGTCGGCTGCT | CCACAACTTCCTGCCAGGGGCCAC | Irshad et al., 2021 |
| Spikelet number per spike | *MOC-7A* | CGGAAAGCTTAGAAATGCACGG | CGGAAAGCTTAGAAATGCACGT | CACCTCTAATCCAATGCGATCC | Zhang et al., 2015a |

**Note:** Standard FAM (5 GAAGGTGACCAAGTTCATGCT-3) and HEX (5-GAAGGTCGGAGTCAACGGATT-3) tails with the targeted SNP not included with the primers.
