# Supplementary material for: Functional gene diversity and zone-targeted genotype prioritization using trait-diagnostic KASP markers in bread wheat (Triticum aestivum L.)
Source: Research Square preprint supplement (doi:10.21203/rs.3.rs-8710524/v1), 2026-02-20
Supplement: Supplementary file 2 [file 3349404aa4530fe9ffab1751.docx]

**Table 1** Details of plant materials used in the study.

| **S. No.** | **Accession** | **Pedigree** | **Accession type** |
| --- | --- | --- | --- |
| 1 | KBRL22 | HD29/W485 | Genetic stock |
| 2 | MP1201 | CMH-82-A-1294/2*KAUZ//MUNIA/CHORLITO/3/MILAN | Variety |
| 3 | HD3118 | ATTILA*2/PBW-65//WEEBILL-1*2/TUKURU | Variety |
| 4 | AKAW3717 | HW2035/NI5439 | Genetic stock |
| 5 | HD2932 | KAUZ/STAR//HD2643 | Variety |
| 6 | FLW3 | UP2338/China 84-40022 | Genetic stock |
| 7 | HS240 | AVOCA/KALYANSONA/BLUEBIRD/WOODPECKER(SIB)/(SIB)PAVON-76 | Variety |
| 8 | AKW2862-1 | VEERI-6//DOVE(SIB)/(SIB)BUCKBUCK | Genetic stock |
| 9 | DBW31 | DBW14/PBW343 | Genetic stock |
| 10 | RAJ3765 | HD2402/VL639 | Variety |
| 11 | HW2001 | SONALIKA//TR-380-14*7/3-AG-14/3/5*SONALIKA | Variety |
| 12 | KRL19 | PBW255/KRL1-4 | Variety |
| 13 | HPW349 | OASIS/SKAUZ//4*BACANORA-88/3/PASTOR/4/KAUZ*2/YACO//KAUZ | Variety |
| 14 | HD2687 | CPAN-2009/HD-2329 | Variety |
| 15 | DBW288 | SOKOLL/3/PASTOR//HXL7573/2*BAU/4/GLADIUS | Genetic stock |
| 16 | PUSA2019A | CS CMS*7/HW2019 | Genetic stock |
| 17 | PBW703 | BW9250*3/YR10/6*AVOCET/3/BW9250*3//YR15/6*AVOCET | Genetic stock |
| 18 | D2 | *Ae. tauschii* (13781)/4*HD2967 | Genetic stock |
| 19 | PBW771 | BW3246/2*DBW17 | Variety |
| 20 | HUW12 | NP876/CIANO 66 | Variety |
| 21 | HD2864 | DL509-2/DL377-8 | Variety |
| 22 | FLW30 | PBW343/Yr15//PBW34/LR28 | Genetic Stock |
| 23 | IC321866 | SK 21, BROWN SPIKE LOCAL WHEAT, RAISEN, MP | Landrace |
| 24 | H567.71 | Developed through a cross involving IAS20 with pedigree *COLONIAS//FRONTANA/KENYA58* | Genetic stock |
| 25 | CMH77.308 | H567.71/3*PELOTAS-ARTHUR | Genetic stock |
| 26 | LGM205 | LOCAL COLLECTION FROM GUJARAT | Landrace |
| 27 | SEL111 | CHINESE-SPRING-monosomic-5B/(SE.CE)RUSSIAN-RYE/C-591//SONALIKA | Genetic stock |
| 28 | HW2049 | HD-2285*6//SUNSTAR*6/C-80-1 | Genetic Stock |
| 29 | SONORA64 | YAKTANA-54//NORIN-10/BREVOR/3/2*YAQUI-54 | Variety |
| 30 | D18 | NIDW15/CS/*Ae. speltoides* | Genetic stock |
| 31 | PWR4099 | CBHW-CHN-89-R-4294O-CHN-S-2BV-97-(EC-4141480) | Genetic Stock |
| 32 | UAS320 | UAS-257//GW-322/DWR-195 | Genetic Stock |
| 33 | PBW698 | BW9250*3/YR10/6*AVOCET/3/BW9250*3//YR15/6*AVOCET | Genetic stock |
| 34 | BNI NOVOJOA | CSMONO3B/3/CS/LE.RA//CS/4/5*NAVOJOA | Genetic stock |
| 35 | NW4035 | WEAWER/WL-2926//SW-89-3064 | Genetic stock |
| 36 | PBW644 | PBW-175/HD-2643 | Variety |
| 37 | LOK44 | CPAN4041/LOK1 | Genetic stock |
| 38 | D55 | PBW 698/(CS/*Ae speltoides*)/WH 1105 | Genetic stock |
| 39 | BNI MUNAL | CSMONO3B//CS*2/LE RA/3/CS PH/4/6*MUNAL | Genetic stock |
| 40 | KALYANSONA | PENJAMO-62(SIB)/GABO-55 | Variety |
| 41 | WH595 | PRL6045/NAC76 | Genetic stock |
| 42 | HS526 | CMH82A.1294/2*KAUZ//MUNIA/CHTO/3/MILAN | Genetic stock |
| 43 | PBW596 | PBW-343/DHARWAD-DRY//PBW-343 | Variety |
| 44 | RNB1001 | HD2687/MACS2846 | Genetic stock |
| 45 | UP262 | SONALIKA(S-308)/BAJIO-66 | Variety |
| 46 | IC296432 | WL711*4/*Aegilops geniculata*Acc. 3547 | Genetic stock |
| 47 | HTW6 | HEAT TOLERANT STOCK | Genetic stock |
| 48 | KHARCHIA65 | KHARCHIA LOCAL/EG 953 | Variety |
| 49 | NP846 | NP760/RIONEGRO | Variety |
| 50 | IC321856 | SK11, PISSILOCAL FROM GUNA, MP | Landrace |
| 51 | IC321849 | SK4, LOCAL COLLECTION FROM RAISEN, MP | Landrace |
| 52 | SONALIKA | II-53-388/ANDES//(SIB)PITIC-62/3/LERMA-ROJO-64 | Variety |
| 53 | IC321910 | SK65, SHARBATI LOCAL FROM AJGAH | Landrace |
| 54 | HW5207-1 | HW3029/*Yr15* | Genetic stock |
| 55 | HD3043 | PAJONAL/BOBWHITE//OPATA-85*2/3/CROC-1/TR.TA(224)//OPATA-85 | Variety |
| 56 | HTW11 | HEAT TOLERANT STOCK | Genetic stock |
| 57 | BNI SONORA | Developed by integrating BNI trait from *Leymus racemosus* into SONORA | Genetic stock |
| 58 | WL5634 | KAVKAZ-CNO-INIA/WL903 | Genetic stock |
| 59 | MBL5 | NP4/HB209 | Genetic stock |
| 60 | FLW29 | PBW343/CAPPELLE DESPREZ/PBW343/Lr28(CS2D2M3/8)F7 | Genetic stock |
| 61 | HINDI62 | PBW-226/HW-1042//HD-2285 | Genetic stock |
| 62 | DBW46 | PBW343/INQ21 | Genetic stock |
| 63 | GW322 | PBW173/GW 196 | Variety |
| 64 | WBM1591 | PYN/BAU//MILAN | Genetic stock |
| 65 | K307 | K8321/UP2003 | Variety |
| 66 | DBW303 | WBLL1*2/BRAMBLING/4/BABAX/LR42//BABAX*2/3/SHAMA*2/5/PBW343*2/KUKUNA*2/FRTL/PIFED | Variety |
| 67 | D16 | PBW698/(*T. turgidum* cv Neodur/ *Th bessarabicum*) EC- 787010 | Genetic stock |
| 68 | GW2002-18 | DL51-91/GW265 | Genetic stock |
| 69 | HW4005 | KALYANSONA*6//C 86-8/KALYANSONA F4 | Variety |
| 70 | FLW5 | UP2338/ARKAN | Genetic stock |
| 71 | HD2888 | C 306/*T. sphaerococcum*//HW 2004 | Variety |
| 72 | CBW38 | CNDO/R 143/ENTE/MEXI_2/3/Ae.SQUARRO SA (TAUS)/4/WEAVER/5/2*PASTOR | Variety |
| 73 | GW366 | DL802-3/GW232 | Variety |
| 74 | BACANORA88 | JUP/BJY//URES | Variety |
| 75 | DBW51 | SITELLA/MILAN | Genetic stock |
| 76 | KRL1-4 | KHARCHIA65/WL711 | Variety |
| 77 | ISD215 | KS/*T. turgidum*//h38/3/SKA//*T. carthlicum*//33/SKA/BLUEBIRD//HD2122 | Genetic stock |
| 78 | WH1061 | WEAWER/WL 2926//SW 89.3064 | Genetic Stock |
| 79 | HD3086 | DBW14/HD2733//HUW468 | Variety |
| 80 | MACS6222 | HD2189*2//MACS2496 | Variety |
| 81 | BNI ROELFS | CSMONO3B//CS*2/LE RA/3/CS PH/4/5*ROLF07 | Genetic Stock |
| 82 | KRL35 | HD-2160/KRL-1-4 (KHARCHIA-LOCAL/WL-711) | Genetic Stock |
| 83 | FLW11 | WH 542*/Hobbit | Genetic stock |
| 84 | FLW13 | WH542*/Yr15(CN25087) | Genetic stock |
| 85 | HI1500 | HW2002*2//STREMPALLI/PNC 5 | Variety |
| 86 | HD3016 | PBW-65/2*PASTOR | Genetic stock |
| 87 | K1213 | HD2733/HD2285 | Variety |
| 88 | RAJ4356 | NOT AVAILABLE | Genetic stock |
| 89 | BNI DBW222 | Developed by integrating BNI trait from *Leymus racemosus* into DBW222 | Genetic stock |
| 90 | D14 | DBW39 /(Highbury/*Ae mutica*) | Genetic stock |
| 91 | LOK1 | SONALIKA/CHOTI-LERMA | Variety |
| 92 | WH542 | JUPATECO-73/BLUEJAY//URES-81 | Variety |
| 93 | DBW327 | NELOKI//SOKOLL /EXCALIBUR | Variety |
| 94 | D127 | SYN224/3*WH1105 | Genetic stock |
| 95 | ALDAN | MAYA-74(SIB)/4/KLEIN-RENDIDOR/2*SONORA-64//INIA-F-66/3/CIANO-F-67/5/NEWTHATCH//STRAMPELLI/YAQUI-50 | Genetic stock |
| 96 | GL23 | LOCAL COLLECTION FROM GUJARAT | Landrace |
| 97 | YR10 | Avocet+Yr10 | Genetic stock |
| 98 | YR15 | Avocet+Yr15 | Genetic stock |
| 99 | IC322007A | SK 162, LOCAL WHEAT FROM CHAMOLI | Landrace |
| 100 | NB29-13-5-9 | LOCAL COLLECTION FROM GUJARAT | Landrace |
| 101 | MP3288 | DOVE/BUC/DL788-2 | Variety |
| 102 | PBW723 | PBW343+Lr57/Yr40+Yr15 | Variety |
| 103 | D22 | DBW39/(Highbury/*Ae mutica*)/DBW 39 | Genetic stock |
| 104 | WL711 | HD1982/K816 | Variety |
| 105 | HI1579 | KAUZ//ALTAR84/AOS/3/MILAN/KAUZ/4/HUITES | Genetic stock |
| 106 | DBW316 | DBW18/DBW 66 | Variety |
| 107 | DL1266-5 | SFW/VAISHALI | Genetic Stock |
| 108 | FKW1 | UP2338*4/CHINA84-40022 | Genetic Stock |
| 109 | DBW252 | PFAU/MILAN/5/C. HEN/AEGILOPS SQUARROSA (TAUS)//BCN/3/VEE#7/BOW/4/PASTOR​ | Variety |
| 110 | DBW39 | ATTILA/HUI | Variety |
| 111 | CPAN3045 | COLLECTION FROM PUNJAB | Landrace |
| 112 | IC322001 | SK 156,VIKAS GEHUN LOCAL WHEAT FROM GOPESHWAR | Landrace |
| 113 | HD2967 | ALONDRA/CUCKOO//URES-81/HD-2160-M/HD-2278 | Variety |
| 114 | DPW621-50 | KAUZ//ALTAR-84/(AOS)AWNED-ONAS/3/MILAN/KAUZ/4/HUITES | Variety |
| 115 | DBW377 | NADI#2*2/6/BECARD#1/5/KIRITATI/4/2*SERI.1B*2/3/KAUZ*2/BOW//KAUZ | Variety |
| 116 | HD30 | HD-2160/HD-1977//HD-7949/HD-1944/HD-2136 | Genetic stock |
| 117 | IC321979 | SK 134, LATE LOCAL VARIANT FROM NAGNI, CHAMBA | Landrace |
| 118 | HD29 | HD2160-HD1977/HD7449-HD 1944/HD2136 | Genetic stock |
| 119 | DBW50 | KAUZ//ALTAR84/AOS/3/MILAN/KAUZ/4/HUITES | Variety |
| 120 | PBW827 | PBW677/PBW703 | Variety |
| 121 | PBW660 | WG6761/WG6798 | Variety |
| 122 | RIL1 | DHARWAD DRY/DPW621-50 | Genetic stock |
| 123 | DTS16 | HD3070/C306 | Genetic stock |
| 124 | DBW187 | NAC/TH.AC//3*P VN/3/MIRLO/BUC /4/2*PASTOR/5/K ACHU/6/KACHU | Variety |
| 125 | VL900 | KAUZ/3/MYNA/BUL/FLK/4/MILAN | Genetic stock |
| 126 | VL798 | CPAN-3004/CPAN-1922/PBW-65 | Genetic stock |
| 127 | HI1580 | HD 2402/HW3007 | Variety |
| 128 | LGM133 | LOCAL COLLECTION FROM GUJARAT | Landrace |
| 129 | W485 | HD1982/WH533 | Genetic stock |
| 130 | SB14 | BH1146/HD2967 | Genetic stock |
| 131 | BNI DBW187 | Developed by integrating BNI trait from *Leymus racemosus* into DBW187 | Genetic stock |
| 132 | IC321950 | SK 105, IMPROVED VARIETY FROM DOLOIGAON, ASSAM | Landrace |
| 133 | IC321946 | SK 101, DWARF WHEAT FROM MORAGAON, ASSAM | Landrace |
| 134 | NW1014 | HAHN'S' | Variety |
| 135 | VL639 | VL421/CPAN1535 | Genetic stock |
| 136 | PBW674 | PBW441/PBW476 | Variety |
| 137 | DBW14 | RAJ3765/PBW343 | Variety |
| 138 | IC321984 | SK 139, BOLD GRAIN OLD VARIETY FROM TEHRI, UTTRANCHAL | Landrace |
| 139 | DBW371 | BORL14/CHIPAK | Variety |
| 140 | HP1531 | COLLECTION FROM PUNJAB | Landrace |
| 141 | LGM139 | LOCAL COLLECTION FROM GUJARAT | Landrace |
| 142 | KBRL10 | HD29/HP1531 | Genetic stock |
| 143 | NARMADA4 | GB-AVS/N14/3/PW5//TH/NP165 | Variety |
| 144 | IC212162 | COLLECTED FROM JAMNAGAR | Landrace |
| 145 | IC321998 | SK 153, PAHARI LOCAL FROM GOPESHWAR | Landrace |
| 146 | COW(W)1 | HD2646//HW2002A/CPAN3057 | Variety |
| 147 | CHIRYA3 | CS/AG.CU//GLEN/3/ALD/PVN/4/NINGMAI NO.4/OLESON//ALD/YANGMAI NO.4 | Variety |
| 148 | RIL110 | DHARWAD DRY/DPW621-50 | Genetic stock |
| 149 | DTS15 | GW366/SQ1 | Genetic stock |
| 150 | GL6 | LOCAL COLLECTION FROM GUJARAT | Landrace |
| 151 | DHARWADDRY | DWR39/C306//HD2189 | Variety |
| 152 | DTS1 | DBW39/SQ1 | Genetic stock |
| 153 | KINGBIRD | TAM200/TUI//PIHA | Variety |
| 154 | DBW296 | SOKOLL/3/PASTO R//HXL7573/2*B AU/4/MASSIV/PP R47.89C | Variety |
| 155 | DTS8 | DBW39/SQ1 | Genetic stock |
| 156 | K9351 | K72/K8027//K72 | Variety |
| 157 | HD2009 | LERMA-ROJO-64-A/NAINARI-60 | Variety |
| 158 | DBW372 | FD08114/BECAR D#1//BOKOTA | Variety |
| 159 | HD2329 | HD1962/E4870/3/K65/5/HD1553/4/UP262 | Variety |
| 160 | IC212161 | COLLECTED FROM JAMNAGAR | Landrace |
| 161 | UP2303 | HD2296/ska | Variety |
| 162 | LGM132 | LOCAL COLLECTION FROM GUJARAT | Landrace |
| 163 | DBW273 | FRANCOLIN #1*2//ND 643/2* WBLLI | Variety |
| 164 | DBW88 | KAUZ//ALTAR-84/AWNED-ONAS/3/MILAN/KAUZ,MEX/4/HUITES | Variety |
| 165 | DBW332 | MUTUS/ROLF07/ /MUCUY | Variety |
| 166 | WH1402 | SHORTENED SR26 TRANSLOCATION//2*WBLL1*2/KKTS/3/BECARD | Variety |
| 167 | BWL9022 | C591/3*PBW343 | Genetic stock |
| 168 | IC296440 | LOCAL COLLECTION FROM GUJARAT | Genetic stock |
| 169 | SQ1 | HIGHBURY/(TW269/9/3/4.CS) | Genetic stock |
| 170 | LGM245 | LOCAL COLLECTION FROM GUJARAT | Landrace |
| 171 | LGM134-B | LOCAL COLLECTION FROM GUJARAT | Landrace |
| 172 | RIL116 | DHARWAD DRY/DPW621-50 | Genetic stock |
| 173 | NB29-6-2-12 | LOCAL COLLECTION FROM GUJARAT | Landrace |
| 174 | C306 | REGENT-1974/CH-23//2*C-591/3/P-19/C-281 | Variety |
| 175 | IC321886 | SK 41, LOCAL COLLECTION FROM BHOPAL, MP | Landrace |
| 176 | SB20 | BH1146/HD2967 | Genetic stock |
| 177 | BNI BORLAUG | Developed by integrating BNI trait from *Leymus racemosus* into Borlaug | Genetic stock |
| 178 | BH1146 | Fronteira/Mentana//Ponta Grossa1 | Variety |
