# Supplementary material for: Functional gene diversity and zone-targeted genotype prioritization using trait-diagnostic KASP markers in bread wheat (Triticum aestivum L.)
Source: Research Square preprint supplement (doi:10.21203/rs.3.rs-8710524/v1), 2026-02-20
Supplement: Supplementary file 3 [file 9e43b0d95cfd9f9cce3e304f.xlsx]

## Sheet: Sheet1
Supplementary Table S1. Detailed information on materials and their allelic variations at 40 SNP loci.
S. No.	Accession name	Adaptation																Biotic and abiotic stress									Quality					Yield
		Reduced height		Vernaliation			Photoperiod sensitivity	Pre-harvest sprouting										Drought	Leaf rust			Stripe rust		Fusarium head blight		Rye translocation	Gluten strength		Grain hardness			Grain weight	Grain weight and length	No. of spikelets/spike	Grain width		Thousand kernel weight
		Rht-B1	Rht-D1	Vrn-A1	Vrn-B1	Vrn-D1	Ppd-D1	PH2L	PH4L	PH5L	PH6L	PHS1_646	PHS1_666	Sdr-B1	VP-1B	MFT_721J (MFT-A1)	MFT_1617R (MFT-A1)	Dreb-B1	Lr14a	Lr34	Lr68	Yr15_R5	Yr15_R8	PFT_KASP (Fhb1)	Fhb1	1BL/1RS	Glu-A1	Glu-D1	Pina-D1	Pinb-D1	Pinb2-B2	TaSBEIII-A	GS-D1	MOC-7A	GW2-6A	GW2-6B	Sus1-7A-1599	Sus1-7A-1185	Sus1-7B	Sus2-2A	Cwi-4A
1	KBRL22	Rht-B1a	Rht-D1a	vrn-A1	vrn-B1	vrn-D1	Ppd-D1b	PH-2La	PH-4La	PH-5Lb	PH-6La	NW97S186 type	NW97S186 type	Sdr-B1b	Vp-1Ba,b	CS type	CS/Jagger type	Dreb-B1a	Lr14+	Lr34-	Lr68+	R5_Yr15-	R8_Yr15+	Fhb1_R	Fhb1-	1BL.1BL	Null	Glu-D1a	Pina-D1b	Pinb-D1a	Pinb-B2b	TaSBEIII-C	GS-D1a	Hap-L	Hap-A	Hap-1	1599-T	1185-T	Hap-C	Hap-A	Hap-4A-C
2	MP1201	Rht-B1b	Rht-D1a	Vrn-A1a	vrn-B1	Vrn-D1a	Ppd-D1b	PH-2Lb	PH-4La	PH-5Lb	PH-6La	Rio Blanco type	Rio Blanco type	Sdr-B1b	Vp-1Ba,b	CS type	CS/Jagger type	Dreb-B1a	Lr14+	Lr34+	Lr68+	R5_Yr15-	R8_Yr15+	Fhb1_R	Fhb1-	1BL.1BL	Null	Glu-D1d	Pina-D1b	Pinb-D1a	Pinb-B2b	TaSBEIII-C	GS-D1a	Hap-L	Hap-A	Hap-1	1599-A	1185-T	Hap-C	Hap-A	Hap-4A-C
3	HD3118	Rht-B1b	Rht-D1a	Vrn-A1a	vrn-B1	vrn-D1	Ppd-D1a	PH-2La	PH-4La	PH-5La	PH-6La	Rio Blanco type	Rio Blanco type	Sdr-B1a	Vp-1Bc	Jagger type	Zen type	Dreb-B1a	Lr14+	Lr34+	Lr68+	R5_Yr15-	R8_Yr15+	Fhb1_R	Fhb1-	1BL.1BL	Null	Glu-D1a	Pina-D1b	Pinb-D1a	Pinb-B2b	TaSBEIII-C	GS-D1a	Hap-L	Hap-A	Hap-1	1599-A	1185-C	Hap-C	Hap-A	Hap-4A-C
4	AKAW3717	Rht-B1a	Rht-D1a	vrn-A1	vrn-B1	vrn-D1	Ppd-D1a	PH-2Lb	PH-4La	PH-5Lb	PH-6La	NW97S186 type	NW97S186 type	Sdr-B1b	Vp-1Ba,b	CS type	CS/Jagger type	Dreb-B1a	Lr14+	Lr34+	Lr68-	R5_Yr15-	R8_Yr15+	Fhb1_R	Fhb1-	1BL.1BL	Ax1 or Ax2*	Glu-D1a	Pina-D1a	Pinb-D1a	Pinb-B2b	TaSBEIII-C	GS-D1a	Hap-L	Hap-A	Hap-1	1599-T	1185-T	Hap-C	Hap-G	Hap-4A-C
5	HD2932	Rht-B1b	Rht-D1a	vrn-A1	vrn-B1	vrn-D1	Ppd-D1b	PH-2Lb	PH-4La	PH-5Lb	PH-6La	NW97S186 type	Rio Blanco type	Sdr-B1a	Vp-1Ba,b	CS type	CS/Jagger type	Dreb-B1a	Lr14+	Lr34+	Lr68+	R5_Yr15-	R8_Yr15+	Fhb1_R	Fhb1-	1BL.1BL	Null	Glu-D1a	Pina-D1b	Pinb-D1b	Pinb-B2a	TaSBEIII-C	GS-D1a	Hap-L	Hap-A	Hap-1	1599-T	1185-T	Hap-C	Hap-A	Hap-4A-C
6	FLW3	Rht-B1a	Rht-D1b	Vrn-A1a	vrn-B1	Vrn-D1a	Ppd-D1b	PH-2Lb	PH-4La	PH-5Lb	PH-6La	Rio Blanco type	Rio Blanco type	Sdr-B1a	Vp-1Ba,b	CS type	CS/Jagger type	Dreb-B1a	Lr14+	Lr34+	Lr68-	R5_Yr15-	R8_Yr15+	Fhb1_R	Fhb1-	1BL.1BL	Ax1 or Ax2*	Glu-D1a	Pina-D1b	Pinb-D1a	Pinb-B2b	TaSBEIII-C	GS-D1a	Hap-L	Hap-A	Hap-1	1599-T	1185-T	Hap-C	Hap-G	Hap-4A-C
7	HS240	Rht-B1b	Rht-D1b	Vrn-A1a	Vrn-B1b	Vrn-D1a	Ppd-D1b	PH-2Lb	PH-4La	PH-5Lb	PH-6La	NW97S186 type	Rio Blanco type	Sdr-B1a	Vp-1Ba,b	CS type	CS/Jagger type	Dreb-B1b	Lr14+	Lr34+	Lr68+	R5_Yr15+	R8_Yr15+	Fhb1_R	Fhb1-	1BL.1BL	Null	Glu-D1a	Pina-D1b	Pinb-D1a	Pinb-B2b	TaSBEIII-C	GS-D1a	Hap-L	Hap-A	Hap-1	1599-T	1185-T	Hap-C	Hap-A	Hap-4A-C
8	AKW2862-1	Rht-B1a	Rht-D1a	Vrn-A1a	vrn-B1	Vrn-D1a	Ppd-D1b	PH-2Lb	PH-4La	PH-5Lb	PH-6La	NW97S186 type	NW97S186 type	Sdr-B1b	Vp-1Ba,b	CS type	CS/Jagger type	Dreb-B1a	Lr14-	Lr34-	Lr68-	R5_Yr15-	R8_Yr15+	Fhb1_R	Fhb1-	1BL.1BL	Null	Glu-D1a	Pina-D1b	Pinb-D1a	Pinb-B2b	TaSBEIII-C	GS-D1a	Hap-L	Hap-A	Hap-1	1599-T	1185-C	Hap-C	Hap-G	Hap-4A-C
9	DBW31	Rht-B1b	Rht-D1a	Vrn-A1a	vrn-B1	Vrn-D1a	Ppd-D1b	PH-2Lb	PH-4La	PH-5Lb	PH-6La	Rio Blanco type	Rio Blanco type	Sdr-B1b	Vp-1Ba,b	CS type	CS/Jagger type	Dreb-B1a	Lr14-	Lr34-	Lr68-	R5_Yr15-	R8_Yr15+	Fhb1_R	Fhb1-	1BL.1BL	Null	Glu-D1a	Pina-D1b	Pinb-D1a	Pinb-B2b	TaSBEIII-C	GS-D1a	Hap-L	Hap-A	Hap-1	1599-T	1185-C	Hap-C	Hap-A	Hap-4A-C
10	RAJ3765	Rht-B1b	Rht-D1a	vrn-A1	vrn-B1	Vrn-D1a	Ppd-D1b	PH-2Lb	PH-4La	PH-5Lb	PH-6Lb	Rio Blanco type	Rio Blanco type	Sdr-B1a	Vp-1Ba,b	CS type	CS/Jagger type	Dreb-B1a	Lr14+	Lr34-	Lr68-	R5_Yr15-	R8_Yr15+	Fhb1_R	Fhb1-	1BL.1BL	Null	Glu-D1a	Pina-D1b	Pinb-D1a	Pinb-B2b	TaSBEIII-C	GS-D1a	Hap-L	Hap-A	Others	1599-T	1185-C	Hap-C	Hap-A	Hap-4A-C
11	HW2001	Rht-B1a	Rht-D1b	vrn-A1	vrn-B1	Vrn-D1a	Ppd-D1b	PH-2Lb	PH-4La	PH-5Lb	PH-6La	Rio Blanco type	NW97S186 type	Sdr-B1a	Vp-1Ba,b	CS type	CS/Jagger type	Dreb-B1a	Lr14+	Lr34+	Lr68-	R5_Yr15-	R8_Yr15+	Fhb1_R	Fhb1-	1BL.1BL	Null	Glu-D1a	Pina-D1b	Pinb-D1b	Pinb-B2b	TaSBEIII-C	GS-D1a	Hap-L	Hap-A	Hap-1	1599-T	1185-T	Hap-C	Hap-G	Hap-4A-C
12	KRL19	Rht-B1a	Rht-D1b	vrn-A1	vrn-B1	Vrn-D1a	Ppd-D1b	PH-2Lb	PH-4La	PH-5Lb	PH-6Lb	Rio Blanco type	Rio Blanco type	Sdr-B1b	Vp-1Ba,b	CS type	CS/Jagger type	Dreb-B1a	Lr14+	Lr34+	Lr68+	R5_Yr15-	R8_Yr15+	Fhb1_R	Fhb1-	1BL.1BL	Null	Glu-D1a	Pina-D1b	Pinb-D1a	Pinb-B2b	TaSBEIII-C	GS-D1a	Hap-L	Hap-A	Hap-1	1599-T	1185-C	Hap-C	Hap-G	Hap-4A-C
13	HPW349	Rht-B1b	Rht-D1b	Vrn-A1a	Vrn-B1b	Vrn-D1a	Ppd-D1b	PH-2Lb	PH-4La	PH-5Lb	PH-6La	NW97S186 type	NW97S186 type	Sdr-B1a	Vp-1Ba,b	CS type	CS/Jagger type	Dreb-B1b	Lr14+	Lr34+	Lr68+	R5_Yr15+	R8_Yr15+	Fhb1_R	Fhb1-	1BL.1BL	Null	Glu-D1d	Pina-D1b	Pinb-D1b	Pinb-B2b	TaSBEIII-C	GS-D1a	Hap-L	Hap-A	Hap-1	1599-T	1185-T	Hap-C	Hap-A	Hap-4A-C
14	HD2687	Rht-B1b	Rht-D1a	vrn-A1	vrn-B1	Vrn-D1a	Ppd-D1b	PH-2Lb	PH-4La	PH-5Lb	PH-6La	NW97S186 type	Rio Blanco type	Sdr-B1a	Vp-1Ba,b	CS type	CS/Jagger type	Dreb-B1a	Lr14-	Lr34+	Lr68+	R5_Yr15-	R8_Yr15+	Fhb1_R	Fhb1-	1BL.1BL	Null	Glu-D1a	Pina-D1b	Pinb-D1a	Pinb-B2b	TaSBEIII-C	GS-D1a	Hap-L	Hap-A	Hap-1	1599-T	1185-T	Hap-C	Hap-A	Hap-4A-C
15	DBW288	Rht-B1b	Rht-D1a	vrn-A1	vrn-B1	Vrn-D1a	Ppd-D1b	PH-2Lb	PH-4La	PH-5Lb	PH-6La	NW97S186 type	Rio Blanco type	Sdr-B1a	Vp-1Ba,b	CS type	CS/Jagger type	Dreb-B1a	Lr14-	Lr34+	Lr68-	R5_Yr15-	R8_Yr15+	Fhb1_R	Fhb1-	1BL.1BL	Null	Glu-D1a	Pina-D1b	Pinb-D1a	Pinb-B2b	TaSBEIII-C	GS-D1a	Hap-L	Hap-A	Hap-1	1599-T	1185-C	Hap-C	Hap-A	Hap-4A-C
16	PUSA2019A	Rht-B1a	Rht-D1a	vrn-A1	vrn-B1	Vrn-D1a	Ppd-D1b	PH-2Lb	PH-4La	PH-5Lb	PH-6Lb	Rio Blanco type	Rio Blanco type	Sdr-B1a	Vp-1Ba,b	CS type	CS/Jagger type	Dreb-B1a	Lr14+	Lr34-	Lr68-	R5_Yr15-	R8_Yr15+	Fhb1_R	Fhb1-	1BL.1BL	Null	Glu-D1d	Pina-D1b	Pinb-D1a	Pinb-B2b	TaSBEIII-C	GS-D1a	Hap-L	Hap-A	Hap-1	1599-T	1185-T	Hap-C	Hap-A	Hap-4A-C
17	PBW703	Rht-B1a	Rht-D1a	vrn-A1	vrn-B1	Vrn-D1a	Ppd-D1b	PH-2Lb	PH-4La	PH-5Lb	PH-6Lb	Rio Blanco type	NW97S186 type	Sdr-B1a	Vp-1Ba,b	CS type	CS/Jagger type	Dreb-B1a	Lr14-	Lr34+	Lr68-	R5_Yr15+	R8_Yr15+	Fhb1_R	Fhb1-	1BL.1BL	Null	Glu-D1a	Pina-D1b	Pinb-D1a	Pinb-B2b	TaSBEIII-C	GS-D1b	Hap-L	Hap-A	Hap-1	1599-T	1185-T	Hap-C	Hap-G	Hap-4A-C
18	D2	Rht-B1a	Rht-D1a	vrn-A1	vrn-B1	vrn-D1	Ppd-D1b	PH-2Lb	PH-4La	PH-5Lb	PH-6La	NW97S186 type	NW97S186 type	Sdr-B1a	Vp-1Ba,b	CS type	CS/Jagger type	Dreb-B1a	Lr14+	Lr34+	Lr68+	R5_Yr15-	R8_Yr15+	Fhb1_R	Fhb1-	1BL.1BL	Null	Glu-D1a	Pina-D1b	Pinb-D1a	Pinb-B2b	TaSBEIII-C	GS-D1a	Hap-L	Hap-A	Hap-1	1599-T	1185-T	Hap-C	Hap-G	Hap-4A-C
19	PBW771	Rht-B1b	Rht-D1a	vrn-A1	vrn-B1	vrn-D1	Ppd-D1b	PH-2Lb	PH-4La	PH-5Lb	PH-6Lb	NW97S186 type	Rio Blanco type	Sdr-B1a	Vp-1Ba,b	CS type	CS/Jagger type	Dreb-B1a	Lr14+	Lr34+	Lr68-	R5_Yr15-	R8_Yr15+	Fhb1_R	Fhb1-	1BL.1BL	Null	Glu-D1d	Pina-D1b	Pinb-D1a	Pinb-B2b	TaSBEIII-C	GS-D1a	Hap-L	Hap-A	Hap-1	1599-T	1185-T	Hap-C	Hap-G	Hap-4A-C
20	HUW12	Rht-B1b	Rht-D1a	Vrn-A1a	vrn-B1	vrn-D1	Ppd-D1b	PH-2Lb	PH-4La	PH-5Lb	PH-6La	NW97S186 type	Rio Blanco type	Sdr-B1a	Vp-1Ba,b	CS type	CS/Jagger type	Dreb-B1a	Lr14+	Lr34-	Lr68-	R5_Yr15-	R8_Yr15+	Fhb1_R	Fhb1-	1BL.1BL	Null	Glu-D1a	Pina-D1b	Pinb-D1a	Pinb-B2b	TaSBEIII-C	GS-D1a	Hap-L	Hap-A	Hap-1	1599-T	1185-T	Hap-C	Hap-A	Hap-4A-C
21	HD2864	Rht-B1b	Rht-D1a	Vrn-A1a	vrn-B1	vrn-D1	Ppd-D1b	PH-2Lb	PH-4La	PH-5Lb	PH-6La	NW97S186 type	Rio Blanco type	Sdr-B1a	Vp-1Ba,b	CS type	CS/Jagger type	Dreb-B1a	Lr14-	Lr34+	Lr68-	R5_Yr15-	R8_Yr15+	Fhb1_R	Fhb1-	1BL.1BL	Null	Glu-D1a	Pina-D1b	Pinb-D1a	Pinb-B2b	TaSBEIII-C	GS-D1a	Hap-L	Hap-A	Hap-1	1599-T	1185-T	Hap-C	Hap-A	Hap-4A-C
22	FLW30	Rht-B1a	Rht-D1b	Vrn-A1a	vrn-B1	vrn-D1	Ppd-D1b	PH-2Lb	PH-4La	PH-5Lb	PH-6La	Rio Blanco type	Rio Blanco type	Sdr-B1a	Vp-1Ba,b	CS type	CS/Jagger type	Dreb-B1a	Lr14+	Lr34+	Lr68-	R5_Yr15-	R8_Yr15+	Fhb1_R	Fhb1-	1BL.1BL	Null	Glu-D1a	Pina-D1b	Pinb-D1a	Pinb-B2b	TaSBEIII-C	GS-D1b	Hap-L	Hap-A	Hap-1	1599-T	1185-T	Hap-C	Hap-A	Hap-4A-C
23	IC321866	Rht-B1b	Rht-D1a	vrn-A1	vrn-B1	vrn-D1	Ppd-D1b	PH-2Lb	PH-4La	PH-5Lb	PH-6La	Rio Blanco type	NW97S186 type	Sdr-B1b	Vp-1Ba,b	CS type	CS/Jagger type	Dreb-B1a	Lr14-	Lr34+	Lr68-	R5_Yr15-	R8_Yr15+	Fhb1_R	Fhb1-	1BL.1BL	Null	Glu-D1a	Pina-D1b	Pinb-D1a	Pinb-B2b	TaSBEIII-C	GS-D1a	Hap-L	Hap-A	Hap-1	1599-T	1185-T	Hap-C	Hap-G	Hap-4A-C
24	H567.71	Rht-B1a	Rht-D1a	vrn-A1	vrn-B1	Vrn-D1a	Ppd-D1a	PH-2Lb	PH-4La	PH-5Lb	PH-6La	NW97S186 type	NW97S186 type	Sdr-B1b	Vp-1Ba,b	CS type	CS/Jagger type	Dreb-B1a	Lr14+	Lr34+	Lr68+	R5_Yr15-	R8_Yr15+	Fhb1_R	Fhb1-	1BL.1BL	Null	Glu-D1a	Pina-D1a	Pinb-D1a	Pinb-B2b	TaSBEIII-C	GS-D1a	Hap-L	Hap-A	Hap-1	1599-T	1185-C	Hap-C	Hap-G	Hap-4A-C
25	CMH77.308	Rht-B1a	Rht-D1a	vrn-A1	vrn-B1	Vrn-D1a	Ppd-D1a	PH-2Lb	PH-4La	PH-5Lb	PH-6Lb	Rio Blanco type	NW97S186 type	Sdr-B1b	Vp-1Ba,b	CS type	CS/Jagger type	Dreb-B1a	Lr14+	Lr34+	Lr68+	R5_Yr15-	R8_Yr15+	Fhb1_R	Fhb1-	1BL.1BL	Null	Glu-D1a	Pina-D1a	Pinb-D1a	Pinb-B2b	TaSBEIII-C	GS-D1a	Hap-L	Hap-A	Hap-1	1599-T	1185-C	Hap-C	Hap-G	Hap-4A-C
26	LGM205	Rht-B1a	Rht-D1a	vrn-A1	vrn-B1	Vrn-D1a	Ppd-D1a	PH-2Lb	PH-4La	PH-5Lb	PH-6Lb	Rio Blanco type	NW97S186 type	Sdr-B1a	Vp-1Bc	CS type	CS/Jagger type	Dreb-B1a	Lr14-	Lr34+	Lr68-	R5_Yr15-	R8_Yr15+	Fhb1_R	Fhb1-	1BL.1BL	Ax1 or Ax2*	Glu-D1a	Pina-D1b	Pinb-D1a	Pinb-B2b	TaSBEIII-C	GS-D1a	Hap-L	Hap-A	Hap-1	1599-T	1185-T	Hap-C	Hap-A	Hap-4A-C
27	SEL111	Rht-B1a	Rht-D1b	Vrn-A1a	vrn-B1	Vrn-D1a	Ppd-D1b	PH-2Lb	PH-4La	PH-5Lb	PH-6Lb	Rio Blanco type	Rio Blanco type	Sdr-B1a	Vp-1Ba,b	CS type	CS/Jagger type	Dreb-B1a	Lr14-	Lr34+	Lr68-	R5_Yr15-	R8_Yr15+	Fhb1_R	Fhb1-	1BL.1BL	Null	Glu-D1a	Pina-D1b	Pinb-D1a	Pinb-B2b	TaSBEIII-C	GS-D1a	Hap-L	Hap-A	Hap-1	1599-A	1185-T	Hap-C	Hap-A	Hap-4A-C
28	HW2049	Rht-B1b	Rht-D1a	Vrn-A1a	vrn-B1	Vrn-D1a	Ppd-D1b	PH-2Lb	PH-4La	PH-5Lb	PH-6La	Rio Blanco type	Rio Blanco type	Sdr-B1a	Vp-1Ba,b	CS type	CS/Jagger type	Dreb-B1a	Lr14+	Lr34+	Lr68-	R5_Yr15-	R8_Yr15+	Fhb1_R	Fhb1-	1BL.1BL	Null	Glu-D1d	Pina-D1b	Pinb-D1a	Pinb-B2b	TaSBEIII-C	GS-D1a	Hap-L	Hap-A	Hap-1	1599-T	1185-T	Hap-C	Hap-A	Hap-4A-C
29	SONORA64	Rht-B1a	Rht-D1b	vrn-A1	vrn-B1	Vrn-D1a	Ppd-D1b	PH-2Lb	PH-4La	PH-5Lb	PH-6Lb	Rio Blanco type	NW97S186 type	Sdr-B1a	Vp-1Ba,b	CS type	CS/Jagger type	Dreb-B1a	Lr14-	Lr34+	Lr68-	R5_Yr15-	R8_Yr15+	Fhb1_R	Fhb1-	1BL.1BL	Null	Glu-D1a	Pina-D1b	Pinb-D1a	Pinb-B2b	TaSBEIII-C	GS-D1a	Hap-L	Hap-A	Hap-1	1599-T	1185-T	Hap-C	Hap-A	Hap-4A-C
30	D18	Rht-B1b	Rht-D1a	vrn-A1	vrn-B1	Vrn-D1a	Ppd-D1b	PH-2Lb	PH-4La	PH-5La	PH-6Lb	Rio Blanco type	Rio Blanco type	Sdr-B1a	Vp-1Ba,b	CS type	CS/Jagger type	Dreb-B1a	Lr14-	Lr34+	Lr68-	R5_Yr15-	R8_Yr15+	Fhb1_R	Fhb1-	1BL.1BL	Null	Glu-D1a	Pina-D1b	Pinb-D1a	Pinb-B2b	TaSBEIII-C	GS-D1a	Hap-L	Hap-A	Hap-1	1599-T	1185-T	Hap-C	Hap-A	Hap-4A-C
31	PWR4099	Rht-B1a	Rht-D1a	vrn-A1	vrn-B1	Vrn-D1a	Ppd-D1b	PH-2Lb	PH-4La	PH-5Lb	PH-6Lb	Rio Blanco type	Rio Blanco type	Sdr-B1a	Vp-1Ba,b	CS type	CS/Jagger type	Dreb-B1a	Lr14+	Lr34+	Lr68-	R5_Yr15-	R8_Yr15+	Fhb1_R	Fhb1-	1BL.1BL	Null	Glu-D1a	Pina-D1a	Pinb-D1a	Pinb-B2b	TaSBEIII-C	GS-D1a	Hap-L	Hap-A	Hap-1	1599-T	1185-T	Hap-C	Hap-G	Hap-4A-C
32	UAS320	Rht-B1a	Rht-D1a	vrn-A1	vrn-B1	Vrn-D1a	Ppd-D1b	PH-2Lb	PH-4La	PH-5La	PH-6Lb	Rio Blanco type	Rio Blanco type	Sdr-B1a	Vp-1Ba,b	CS type	CS/Jagger type	Dreb-B1a	Lr14+	Lr34+	Lr68-	R5_Yr15-	R8_Yr15+	Fhb1_R	Fhb1-	1BL.1BL	Null	Glu-D1a	Pina-D1b	Pinb-D1a	Pinb-B2b	TaSBEIII-C	GS-D1a	Hap-L	Hap-A	Hap-1	1599-T	1185-T	Hap-C	Hap-A	Hap-4A-C
33	PBW698	Rht-B1a	Rht-D1a	vrn-A1	vrn-B1	Vrn-D1a	Ppd-D1b	PH-2Lb	PH-4La	PH-5Lb	PH-6Lb	NW97S186 type	Rio Blanco type	Sdr-B1a	Vp-1Ba,b	CS type	CS/Jagger type	Dreb-B1a	Lr14-	Lr34+	Lr68-	R5_Yr15-	R8_Yr15+	Fhb1_R	Fhb1-	1BL.1BL	Null	Glu-D1a	Pina-D1b	Pinb-D1a	Pinb-B2b	TaSBEIII-C	GS-D1a	Hap-L	Hap-A	Hap-1	1599-T	1185-T	Hap-C	Hap-A	Hap-4A-C
34	BNI NOVOJOA	Rht-B1a	Rht-D1a	vrn-A1	vrn-B1	Vrn-D1a	Ppd-D1b	PH-2Lb	PH-4La	PH-5Lb	PH-6Lb	Rio Blanco type	Rio Blanco type	Sdr-B1a	Vp-1Ba,b	CS type	CS/Jagger type	Dreb-B1a	Lr14-	Lr34+	Lr68-	R5_Yr15-	R8_Yr15+	Fhb1_R	Fhb1-	1BL.1BL	Null	Glu-D1a	Pina-D1b	Pinb-D1a	Pinb-B2b	TaSBEIII-C	GS-D1a	Hap-L	Hap-A	Hap-1	1599-T	1185-C	Hap-C	Hap-A	Hap-4A-C
35	NW4035	Rht-B1a	Rht-D1a	vrn-A1	vrn-B1	Vrn-D1a	Ppd-D1b	PH-2Lb	PH-4La	PH-5Lb	PH-6Lb	Rio Blanco type	Rio Blanco type	Sdr-B1a	Vp-1Ba,b	CS type	CS/Jagger type	Dreb-B1a	Lr14-	Lr34-	Lr68-	R5_Yr15-	R8_Yr15+	Fhb1_R	Fhb1-	1BL.1BL	Null	Glu-D1a	Pina-D1b	Pinb-D1a	Pinb-B2b	TaSBEIII-C	GS-D1a	Hap-L	Hap-A	Hap-1	1599-T	1185-C	Hap-C	Hap-A	Hap-4A-C
36	PBW644	Rht-B1a	Rht-D1a	vrn-A1	vrn-B1	Vrn-D1a	Ppd-D1b	PH-2Lb	PH-4La	PH-5Lb	PH-6Lb	Rio Blanco type	Rio Blanco type	Sdr-B1a	Vp-1Ba,b	CS type	CS/Jagger type	Dreb-B1a	Lr14+	Lr34-	Lr68+	R5_Yr15-	R8_Yr15+	Fhb1_R	Fhb1-	1BL.1BL	Null	Glu-D1a	Pina-D1b	Pinb-D1a	Pinb-B2b	TaSBEIII-C	GS-D1a	Hap-L	Hap-A	Hap-1	1599-T	1185-C	Hap-C	Hap-A	Hap-4A-C
37	LOK44	Rht-B1a	Rht-D1b	vrn-A1	vrn-B1	Vrn-D1a	Ppd-D1b	PH-2Lb	PH-4La	PH-5Lb	PH-6Lb	Rio Blanco type	Rio Blanco type	Sdr-B1a	Vp-1Ba,b	CS type	CS/Jagger type	Dreb-B1a	Lr14+	Lr34+	Lr68-	R5_Yr15-	R8_Yr15+	Fhb1_R	Fhb1-	1BL.1BL	Null	Glu-D1a	Pina-D1a	Pinb-D1b	Pinb-B2b	TaSBEIII-C	GS-D1a	Hap-L	Hap-A	Hap-1	1599-T	1185-C	Hap-C	Hap-G	Hap-4A-C
38	D55	Rht-B1a	Rht-D1a	vrn-A1	vrn-B1	Vrn-D1a	Ppd-D1b	PH-2Lb	PH-4La	PH-5Lb	PH-6Lb	Rio Blanco type	Rio Blanco type	Sdr-B1a	Vp-1Ba,b	CS type	CS/Jagger type	Dreb-B1a	Lr14-	Lr34+	Lr68-	R5_Yr15-	R8_Yr15+	Fhb1_R	Fhb1-	1BL.1BL	Null	Glu-D1a	Pina-D1b	Pinb-D1a	Pinb-B2b	TaSBEIII-C	GS-D1a	Hap-L	Hap-A	Hap-1	1599-T	1185-T	Hap-C	Hap-A	Hap-4A-C
39	BNI MUNAL	Rht-B1a	Rht-D1a	vrn-A1	vrn-B1	vrn-D1	Ppd-D1b	PH-2Lb	PH-4La	PH-5Lb	PH-6Lb	Rio Blanco type	Rio Blanco type	Sdr-B1b	Vp-1Ba,b	CS type	CS/Jagger type	Dreb-B1a	Lr14-	Lr34+	Lr68-	R5_Yr15-	R8_Yr15+	Fhb1_R	Fhb1-	1BL.1BL	Null	Glu-D1d	Pina-D1b	Pinb-D1a	Pinb-B2b	TaSBEIII-C	GS-D1a	Hap-L	Hap-A	Hap-1	1599-T	1185-C	Hap-C	Hap-A	Hap-4A-C
40	KALYANSONA	Rht-B1b	Rht-D1a	Vrn-A1a	vrn-B1	vrn-D1	Ppd-D1b	PH-2Lb	PH-4La	PH-5Lb	PH-6Lb	Rio Blanco type	Rio Blanco type	Sdr-B1a	Vp-1Ba,b	CS type	CS/Jagger type	Dreb-B1a	Lr14-	Lr34+	Lr68-	R5_Yr15-	R8_Yr15+	Fhb1_R	Fhb1-	1BL.1BL	Null	Glu-D1a	Pina-D1b	Pinb-D1a	Pinb-B2b	TaSBEIII-C	GS-D1a	Hap-L	Hap-A	Hap-1	1599-T	1185-T	Hap-C	Hap-G	Hap-4A-C
41	WH595	Rht-B1b	Rht-D1a	Vrn-A1a	vrn-B1	vrn-D1	Ppd-D1b	PH-2Lb	PH-4La	PH-5Lb	PH-6Lb	Rio Blanco type	Rio Blanco type	Sdr-B1a	Vp-1Ba,b	CS type	CS/Jagger type	Dreb-B1a	Lr14-	Lr34-	Lr68-	R5_Yr15-	R8_Yr15+	Fhb1_R	Fhb1-	1BL.1BL	Null	Glu-D1a	Pina-D1b	Pinb-D1a	Pinb-B2b	TaSBEIII-C	GS-D1a	Hap-L	Hap-A	Hap-1	1599-T	1185-T	Hap-C	Hap-A	Hap-4A-C
42	HS526	Rht-B1a	Rht-D1a	vrn-A1	vrn-B1	vrn-D1	Ppd-D1b	PH-2Lb	PH-4La	PH-5Lb	PH-6Lb	Rio Blanco type	NW97S186 type	Sdr-B1a	Vp-1Ba,b	CS type	CS/Jagger type	Dreb-B1a	Lr14-	Lr34+	Lr68-	R5_Yr15-	R8_Yr15+	Fhb1_R	Fhb1-	1BL.1BL	Null	Glu-D1a	Pina-D1b	Pinb-D1a	Pinb-B2b	TaSBEIII-C	GS-D1a	Hap-L	Hap-A	Hap-1	1599-T	1185-T	Hap-C	Hap-G	Hap-4A-C
43	PBW596	Rht-B1a	Rht-D1a	vrn-A1	vrn-B1	vrn-D1	Ppd-D1a	PH-2La	PH-4La	PH-5La	PH-6La	Rio Blanco type	Rio Blanco type	Sdr-B1a	Vp-1Ba,b	CS type	CS/Jagger type	Dreb-B1a	Lr14-	Lr34-	Lr68-	R5_Yr15-	R8_Yr15+	Fhb1_R	Fhb1-	1BL.1BL	Null	Glu-D1a	Pina-D1b	Pinb-D1a	Pinb-B2b	TaSBEIII-T	GS-D1a	Hap-L	Hap-A	Hap-1	1599-T	1185-T	Hap-C	Hap-A	Hap-4A-C
44	RNB1001	Rht-B1a	Rht-D1a	vrn-A1	vrn-B1	vrn-D1	Ppd-D1b	PH-2Lb	PH-4La	PH-5Lb	PH-6Lb	Rio Blanco type	Rio Blanco type	Sdr-B1a	Vp-1Ba,b	CS type	CS/Jagger type	Dreb-B1a	Lr14+	Lr34+	Lr68-	R5_Yr15-	R8_Yr15+	Fhb1_R	Fhb1-	1BL.1BL	Null	Glu-D1a	Pina-D1b	Pinb-D1a	Pinb-B2b	TaSBEIII-C	GS-D1a	Hap-L	Hap-A	Hap-1	1599-T	1185-T	Hap-C	Hap-A	Hap-4A-C
45	UP262	Rht-B1a	Rht-D1b	vrn-A1	vrn-B1	vrn-D1	Ppd-D1b	PH-2Lb	PH-4La	PH-5Lb	PH-6Lb	NW97S186 type	Rio Blanco type	Sdr-B1a	Vp-1Ba,b	CS type	CS/Jagger type	Dreb-B1a	Lr14-	Lr34+	Lr68-	R5_Yr15-	R8_Yr15+	Fhb1_R	Fhb1-	1BL.1BL	Null	Glu-D1a	Pina-D1b	Pinb-D1a	Pinb-B2b	TaSBEIII-C	GS-D1a	Hap-L	Hap-A	Hap-1	1599-T	1185-C	Hap-C	Hap-A	Hap-4A-C
46	IC296432	Rht-B1a	Rht-D1a	vrn-A1	vrn-B1	Vrn-D1a	Ppd-D1b	PH-2Lb	PH-4La	PH-5Lb	PH-6La	Rio Blanco type	Rio Blanco type	Sdr-B1a	Vp-1Ba,b	CS type	CS/Jagger type	Dreb-B1a	Lr14-	Lr34+	Lr68-	R5_Yr15-	R8_Yr15+	Fhb1_R	Fhb1-	1BL.1BL	Ax1 or Ax2*	Glu-D1a	Pina-D1a	Pinb-D1a	Pinb-B2b	TaSBEIII-C	GS-D1a	Hap-L	Hap-A	Hap-1	1599-T	1185-T	Hap-C	Hap-A	Hap-4A-C
47	HTW6	Rht-B1b	Rht-D1b	Vrn-A1a	Vrn-B1b	Vrn-D1a	Ppd-D1a	PH-2Lb	PH-4Lb	PH-5Lb	PH-6Lb	NW97S186 type	NW97S186 type	Sdr-B1b	Vp-1Ba,b	CS type	CS/Jagger type	Dreb-B1a	Lr14-	Lr34-	Lr68-	R5_Yr15-	R8_Yr15-	Fhb1_R	Fhb1-	1BL.1BL	Ax1 or Ax2*	Glu-D1a	Pina-D1a	Pinb-D1a	Pinb-B2a	TaSBEIII-C	GS-D1a	Hap-L	Hap-A	Hap-1	1599-A	1185-C	Hap-C	Hap-A	Hap-4A-C
48	KHARCHIA65	Rht-B1a	Rht-D1a	vrn-A1	vrn-B1	Vrn-D1a	Ppd-D1a	PH-2Lb	PH-4La	PH-5Lb	PH-6La	Rio Blanco type	Rio Blanco type	Sdr-B1a	Vp-1Ba,b	CS type	CS/Jagger type	Dreb-B1a	Lr14+	Lr34+	Lr68-	R5_Yr15-	R8_Yr15+	Fhb1_R	Fhb1-	1BL.1BL	Null	Glu-D1a	Pina-D1a	Pinb-D1a	Pinb-B2b	TaSBEIII-C	GS-D1a	Hap-L	Hap-A	Hap-1	1599-T	1185-T	Hap-C	Hap-A	Hap-4A-C
49	NP846	Rht-B1a	Rht-D1a	Vrn-A1a	Vrn-B1b	Vrn-D1a	Ppd-D1a	PH-2Lb	PH-4La	PH-5Lb	PH-6Lb	Rio Blanco type	Rio Blanco type	Sdr-B1a	Vp-1Ba,b	CS type	CS/Jagger type	Dreb-B1b	Lr14+	Lr34+	Lr68-	R5_Yr15+	R8_Yr15+	Fhb1_R	Fhb1-	1BL.1BL	Ax1 or Ax2*	Glu-D1a	Pina-D1a	Pinb-D1b	Pinb-B2b	TaSBEIII-C	GS-D1a	Hap-L	Hap-A	Hap-1	1599-T	1185-T	Hap-C	Hap-G	Hap-4A-C
50	IC321856	Rht-B1a	Rht-D1a	vrn-A1	vrn-B1	Vrn-D1a	Ppd-D1a	PH-2Lb	PH-4La	PH-5Lb	PH-6Lb	NW97S186 type	NW97S186 type	Sdr-B1b	Vp-1Ba,b	CS type	CS/Jagger type	Dreb-B1a	Lr14+	Lr34+	Lr68-	R5_Yr15-	R8_Yr15+	Fhb1_R	Fhb1-	1BL.1BL	Null	Glu-D1a	Pina-D1a	Pinb-D1b	Pinb-B2b	TaSBEIII-C	GS-D1a	Hap-L	Hap-A	Hap-1	1599-T	1185-T	Hap-C	Hap-G	Hap-4A-C
51	IC321849	Rht-B1a	Rht-D1a	vrn-A1	vrn-B1	Vrn-D1a	Ppd-D1a	PH-2La	PH-4La	PH-5La	PH-6La	Rio Blanco type	Rio Blanco type	Sdr-B1b	Vp-1Ba,b	CS type	CS/Jagger type	Dreb-B1a	Lr14+	Lr34+	Lr68-	R5_Yr15-	R8_Yr15+	Fhb1_R	Fhb1-	1BL.1BL	Ax1 or Ax2*	Glu-D1a	Pina-D1a	Pinb-D1a	Pinb-B2b	TaSBEIII-C	GS-D1a	Hap-L	Hap-G	Others	1599-T	1185-T	Hap-T	Hap-A	Hap-4A-C
52	SONALIKA	Rht-B1a	Rht-D1b	Vrn-A1a	vrn-B1	Vrn-D1a	Ppd-D1b	PH-2Lb	PH-4La	PH-5Lb	PH-6Lb	Rio Blanco type	NW97S186 type	Sdr-B1a	Vp-1Ba,b	CS type	CS/Jagger type	Dreb-B1a	Lr14-	Lr34+	Lr68-	R5_Yr15-	R8_Yr15+	Fhb1_R	Fhb1-	1BL.1BL	Null	Glu-D1a	Pina-D1a	Pinb-D1b	Pinb-B2b	TaSBEIII-C	GS-D1a	Hap-L	Hap-A	Hap-1	1599-T	1185-T	Hap-C	Hap-G	Hap-4A-C
53	IC321910	Rht-B1a	Rht-D1b	vrn-A1	vrn-B1	Vrn-D1a	Ppd-D1b	PH-2Lb	PH-4La	PH-5Lb	PH-6La	NW97S186 type	NW97S186 type	Sdr-B1b	Vp-1Ba,b	CS type	CS/Jagger type	Dreb-B1a	Lr14-	Lr34+	Lr68-	R5_Yr15-	R8_Yr15+	Fhb1_R	Fhb1-	1BL.1BL	Null	Glu-D1a	Pina-D1a	Pinb-D1b	Pinb-B2b	TaSBEIII-C	GS-D1b	Hap-L	Hap-G	Hap-1	1599-A	1185-T	Hap-C	Hap-G	Hap-4A-C
54	HW5207-1	Rht-B1b	Rht-D1a	Vrn-A1a	vrn-B1	vrn-D1	Ppd-D1b	PH-2Lb	PH-4La	PH-5Lb	PH-6La	NW97S186 type	NW97S186 type	Sdr-B1a	Vp-1Ba,b	CS type	CS/Jagger type	Dreb-B1a	Lr14-	Lr34+	Lr68-	R5_Yr15-	R8_Yr15+	Fhb1_R	Fhb1-	1BL.1BL	Null	Glu-D1a	Pina-D1b	Pinb-D1a	Pinb-B2b	TaSBEIII-C	GS-D1b	Hap-L	Hap-A	Hap-1	1599-A	1185-T	Hap-C	Hap-A	Hap-4A-T
55	HD3043	Rht-B1a	Rht-D1b	vrn-A1	vrn-B1	vrn-D1	Ppd-D1b	PH-2Lb	PH-4La	PH-5Lb	PH-6Lb	Rio Blanco type	Rio Blanco type	Sdr-B1b	Vp-1Ba,b	CS type	CS/Jagger type	Dreb-B1a	Lr14+	Lr34+	Lr68+	R5_Yr15-	R8_Yr15+	Fhb1_R	Fhb1-	1BL.1BL	Null	Glu-D1a	Pina-D1b	Pinb-D1a	Pinb-B2b	TaSBEIII-C	GS-D1a	Hap-L	Hap-A	Hap-1	1599-T	1185-T	Hap-C	Hap-A	Hap-4A-C
56	HTW11	Rht-B1a	Rht-D1a	Vrn-A1a	Vrn-B1b	Vrn-D1a	Ppd-D1a	PH-2Lb	PH-4La	PH-5Lb	PH-6Lb	NW97S186 type	Rio Blanco type	Sdr-B1b	Vp-1Ba,b	CS type	CS/Jagger type	Dreb-B1a	Lr14-	Lr34+	Lr68-	R5_Yr15-	R8_Yr15+	Fhb1_R	Fhb1-	1BL.1BL	Ax1 or Ax2*	Glu-D1a	Pina-D1b	Pinb-D1a	Pinb-B2b	TaSBEIII-C	GS-D1a	Hap-L	Hap-A	Hap-1	1599-T	1185-T	Hap-C	Hap-A	Hap-4A-C
57	BNI SONORA	Rht-B1a	Rht-D1b	Vrn-A1a	Vrn-B1b	Vrn-D1a	Ppd-D1b	PH-2Lb	PH-4La	PH-5Lb	PH-6Lb	Rio Blanco type	NW97S186 type	Sdr-B1a	Vp-1Ba,b	CS type	CS/Jagger type	Dreb-B1a	Lr14-	Lr34+	Lr68-	R5_Yr15-	R8_Yr15+	Fhb1_R	Fhb1-	1BL.1BL	Null	Glu-D1a	Pina-D1b	Pinb-D1a	Pinb-B2b	TaSBEIII-C	GS-D1a	Hap-L	Hap-A	Hap-1	1599-T	1185-T	Hap-C	Hap-A	Hap-4A-C
58	WL5634	Rht-B1b	Rht-D1b	Vrn-A1a	Vrn-B1b	vrn-D1	Ppd-D1b	PH-2Lb	PH-4La	PH-5Lb	PH-6Lb	Rio Blanco type	Rio Blanco type	Sdr-B1a	Vp-1Ba,b	CS type	CS/Jagger type	Dreb-B1a	Lr14+	Lr34+	Lr68-	R5_Yr15-	R8_Yr15+	Fhb1_R	Fhb1-	1BL.1BL	Null	Glu-D1a	Pina-D1b	Pinb-D1a	Pinb-B2b	TaSBEIII-C	GS-D1b	Hap-L	Hap-A	Hap-1	1599-T	1185-T	Hap-C	Hap-A	Hap-4A-C
59	MBL5	Rht-B1b	Rht-D1b	Vrn-A1a	Vrn-B1b	Vrn-D1a	Ppd-D1a	PH-2Lb	PH-4Lb	PH-5Lb	PH-6Lb	NW97S186 type	Rio Blanco type	Sdr-B1a	Vp-1Bc	Jagger type	Zen type	Dreb-B1a	Lr14-	Lr34+	Lr68-	R5_Yr15-	R8_Yr15+	Fhb1_R	Fhb1-	1BL.1BL	Null	Glu-D1d	Pina-D1a	Pinb-D1a	Pinb-B2b	TaSBEIII-C	GS-D1a	Hap-L	Hap-A	Hap-1	1599-T	1185-C	Hap-C	Hap-A	Hap-4A-C
60	FLW29	Rht-B1b	Rht-D1a	vrn-A1	vrn-B1	Vrn-D1a	Ppd-D1b	PH-2Lb	PH-4La	PH-5Lb	PH-6La	NW97S186 type	NW97S186 type	Sdr-B1a	Vp-1Ba,b	CS type	CS/Jagger type	Dreb-B1a	Lr14-	Lr34+	Lr68+	R5_Yr15-	R8_Yr15+	Fhb1_R	Fhb1-	1BL.1BL	Ax1 or Ax2*	Glu-D1a	Pina-D1b	Pinb-D1a	Pinb-B2b	TaSBEIII-C	GS-D1a	Hap-L	Hap-A	Hap-1	1599-T	1185-T	Hap-C	Hap-A	Hap-4A-C
61	HINDI62	Rht-B1a	Rht-D1a	vrn-A1	vrn-B1	Vrn-D1a	Ppd-D1a	PH-2Lb	PH-4La	PH-5Lb	PH-6La	Rio Blanco type	Rio Blanco type	Sdr-B1a	Vp-1Ba,b	CS type	CS/Jagger type	Dreb-B1a	Lr14+	Lr34+	Lr68-	R5_Yr15-	R8_Yr15+	Fhb1_R	Fhb1-	1BL.1BL	Ax1 or Ax2*	Glu-D1a	Pina-D1a	Pinb-D1a	Pinb-B2b	TaSBEIII-C	GS-D1a	Hap-H	Hap-A	Hap-1	1599-T	1185-T	Hap-C	Hap-A	Hap-4A-C
62	DBW46	Rht-B1a	Rht-D1a	vrn-A1	vrn-B1	Vrn-D1a	Ppd-D1b	PH-2Lb	PH-4La	PH-5Lb	PH-6La	Rio Blanco type	Rio Blanco type	Sdr-B1a	Vp-1Ba,b	CS type	CS/Jagger type	Dreb-B1a	Lr14+	Lr34+	Lr68+	R5_Yr15-	R8_Yr15+	Fhb1_R	Fhb1-	1BL.1BL	Null	Glu-D1a	Pina-D1b	Pinb-D1a	Pinb-B2b	TaSBEIII-C	GS-D1a	Hap-L	Hap-A	Hap-1	1599-T	1185-T	Hap-C	Hap-A	Hap-4A-C
63	GW322	Rht-B1b	Rht-D1a	vrn-A1	vrn-B1	Vrn-D1a	Ppd-D1b	PH-2Lb	PH-4La	PH-5Lb	PH-6La	NW97S186 type	Rio Blanco type	Sdr-B1a	Vp-1Ba,b	CS type	CS/Jagger type	Dreb-B1a	Lr14-	Lr34-	Lr68-	R5_Yr15-	R8_Yr15+	Fhb1_R	Fhb1-	1BL.1BL	Null	Glu-D1d	Pina-D1b	Pinb-D1a	Pinb-B2b	TaSBEIII-C	GS-D1a	Hap-L	Hap-A	Hap-1	1599-T	1185-T	Hap-C	Hap-A	Hap-4A-C
64	WBM1591	Rht-B1b	Rht-D1a	vrn-A1	vrn-B1	Vrn-D1a	Ppd-D1b	PH-2Lb	PH-4La	PH-5Lb	PH-6La	NW97S186 type	Rio Blanco type	Sdr-B1a	Vp-1Ba,b	CS type	CS/Jagger type	Dreb-B1a	Lr14-	Lr34+	Lr68-	R5_Yr15-	R8_Yr15+	Fhb1_R	Fhb1-	1BL.1BL	Null	Glu-D1a	Pina-D1b	Pinb-D1a	Pinb-B2b	TaSBEIII-C	GS-D1a	Hap-L	Hap-A	Hap-1	1599-T	1185-T	Hap-C	Hap-G	Hap-4A-C
65	K307	Rht-B1a	Rht-D1b	vrn-A1	vrn-B1	Vrn-D1a	Ppd-D1b	PH-2Lb	PH-4La	PH-5Lb	PH-6La	Rio Blanco type	Rio Blanco type	Sdr-B1a	Vp-1Ba,b	CS type	CS/Jagger type	Dreb-B1a	Lr14-	Lr34+	Lr68-	R5_Yr15-	R8_Yr15+	Fhb1_R	Fhb1-	1BL.1BL	Null	Glu-D1a	Pina-D1b	Pinb-D1a	Pinb-B2b	TaSBEIII-C	GS-D1a	Hap-L	Hap-A	Hap-1	1599-T	1185-T	Hap-C	Hap-G	Hap-4A-C
66	DBW303	Rht-B1b	Rht-D1a	vrn-A1	vrn-B1	Vrn-D1a	Ppd-D1b	PH-2Lb	PH-4La	PH-5Lb	PH-6La	NW97S186 type	Rio Blanco type	Sdr-B1a	Vp-1Ba,b	CS type	CS/Jagger type	Dreb-B1a	Lr14-	Lr34+	Lr68-	R5_Yr15-	R8_Yr15+	Fhb1_R	Fhb1-	1BL.1BL	Null	Glu-D1d	Pina-D1b	Pinb-D1a	Pinb-B2b	TaSBEIII-C	GS-D1a	Hap-L	Hap-A	Hap-1	1599-T	1185-C	Hap-C	Hap-A	Hap-4A-C
67	D16	Rht-B1b	Rht-D1a	vrn-A1	vrn-B1	Vrn-D1a	Ppd-D1b	PH-2Lb	PH-4La	PH-5Lb	PH-6La	NW97S186 type	Rio Blanco type	Sdr-B1a	Vp-1Ba,b	CS type	CS/Jagger type	Dreb-B1a	Lr14-	Lr34+	Lr68-	R5_Yr15-	R8_Yr15+	Fhb1_R	Fhb1-	1BL.1BL	Null	Glu-D1d	Pina-D1b	Pinb-D1a	Pinb-B2b	TaSBEIII-C	GS-D1a	Hap-L	Hap-A	Hap-1	1599-T	1185-T	Hap-C	Hap-A	Hap-4A-C
68	GW2002-18	Rht-B1b	Rht-D1a	Vrn-A1a	vrn-B1	vrn-D1	Ppd-D1b	PH-2Lb	PH-4La	PH-5Lb	PH-6La	NW97S186 type	Rio Blanco type	Sdr-B1a	Vp-1Ba,b	CS type	CS/Jagger type	Dreb-B1a	Lr14+	Lr34-	Lr68-	R5_Yr15-	R8_Yr15+	Fhb1_R	Fhb1-	1BL.1BL	Null	Glu-D1a	Pina-D1b	Pinb-D1a	Pinb-B2b	TaSBEIII-C	GS-D1a	Hap-L	Hap-A	Hap-1	1599-T	1185-C	Hap-C	Hap-A	Hap-4A-C
69	HW4005	Rht-B1b	Rht-D1a	Vrn-A1a	vrn-B1	vrn-D1	Ppd-D1b	PH-2Lb	PH-4La	PH-5Lb	PH-6La	NW97S186 type	Rio Blanco type	Sdr-B1a	Vp-1Ba,b	CS type	CS/Jagger type	Dreb-B1a	Lr14-	Lr34+	Lr68-	R5_Yr15-	R8_Yr15+	Fhb1_R	Fhb1-	1BL.1BL	Null	Glu-D1a	Pina-D1b	Pinb-D1a	Pinb-B2b	TaSBEIII-C	GS-D1a	Hap-L	Hap-G	Others	1599-T	1185-T	Hap-C	Hap-G	Hap-4A-C
70	FLW5	Rht-B1b	Rht-D1b	Vrn-A1a	Vrn-B1b	Vrn-D1a	Ppd-D1a	PH-2Lb	PH-4La	PH-5Lb	PH-6La	Rio Blanco type	Rio Blanco type	Sdr-B1a	Vp-1Bc	Jagger type	Zen type	Dreb-B1a	Lr14+	Lr34+	Lr68+	R5_Yr15-	R8_Yr15+	Fhb1_R	Fhb1-	1BL.1BL	Null	Glu-D1a	Pina-D1a	Pinb-D1b	Pinb-B2b	TaSBEIII-C	GS-D1a	Hap-L	Hap-A	Hap-1	1599-T	1185-C	Hap-C	Hap-G	Hap-4A-C
71	HD2888	Rht-B1b	Rht-D1a	Vrn-A1a	Vrn-B1b	Vrn-D1a	Ppd-D1a	PH-2La	PH-4La	PH-5Lb	PH-6La	Rio Blanco type	Rio Blanco type	Sdr-B1a	Vp-1Bc	Jagger type	Zen type	Dreb-B1a	Lr14+	Lr34+	Lr68-	R5_Yr15-	R8_Yr15+	Fhb1_R	Fhb1-	1BL.1RS	Ax1 or Ax2*	Glu-D1a	Pina-D1b	Pinb-D1a	Pinb-B2b	TaSBEIII-C	GS-D1a	Hap-L	Hap-A	Hap-1	1599-A	1185-C	Hap-C	Hap-G	Hap-4A-T
72	CBW38	Rht-B1b	Rht-D1b	Vrn-A1a	vrn-B1	Vrn-D1a	Ppd-D1b	PH-2Lb	PH-4La	PH-5Lb	PH-6Lb	NW97S186 type	NW97S186 type	Sdr-B1b	Vp-1Bc	CS type	Zen type	Dreb-B1b	Lr14+	Lr34+	Lr68+	R5_Yr15-	R8_Yr15-	Fhb1_R	Fhb1+	1BL.1RS	Null	Glu-D1a	Pina-D1b	Pinb-D1a	Pinb-B2b	TaSBEIII-T	GS-D1a	Hap-H	Hap-A	Hap-1	1599-A	1185-T	Hap-C	Hap-G	Hap-4A-C
73	GW366	Rht-B1b	Rht-D1b	Vrn-A1a	Vrn-B1b	Vrn-D1a	Ppd-D1b	PH-2Lb	PH-4La	PH-5Lb	PH-6Lb	NW97S186 type	NW97S186 type	Sdr-B1b	Vp-1Bc	CS type	Zen type	Dreb-B1b	Lr14-	Lr34+	Lr68+	R5_Yr15-	R8_Yr15-	Fhb1_R	Fhb1+	1BL.1RS	Null	Glu-D1a	Pina-D1b	Pinb-D1a	Pinb-B2b	TaSBEIII-C	GS-D1a	Hap-H	Hap-A	Hap-1	1599-A	1185-T	Hap-C	Hap-A	Hap-4A-C
74	BACANORA88	Rht-B1b	Rht-D1b	Vrn-A1a	Vrn-B1b	Vrn-D1a	Ppd-D1b	PH-2Lb	PH-4La	PH-5Lb	PH-6Lb	NW97S186 type	NW97S186 type	Sdr-B1b	Vp-1Bc	CS type	Zen type	Dreb-B1b	Lr14-	Lr34-	Lr68+	R5_Yr15-	R8_Yr15-	Fhb1_R	Fhb1+	1BL.1RS	Null	Glu-D1a	Pina-D1b	Pinb-D1a	Pinb-B2b	TaSBEIII-C	GS-D1a	Hap-H	Hap-A	Hap-1	1599-A	1185-T	Hap-C	Hap-A	Hap-4A-C
75	DBW51	Rht-B1b	Rht-D1a	vrn-A1	vrn-B1	Vrn-D1a	Ppd-D1a	PH-2La	PH-4La	PH-5La	PH-6La	Rio Blanco type	Rio Blanco type	Sdr-B1a	Vp-1Ba,b	CS type	CS/Jagger type	Dreb-B1a	Lr14-	Lr34-	Lr68-	R5_Yr15-	R8_Yr15+	Fhb1_R	Fhb1-	1BL.1BL	Null	Glu-D1a	Pina-D1b	Pinb-D1a	Pinb-B2b	TaSBEIII-C	GS-D1a	Hap-L	Hap-A	Hap-1	1599-T	1185-C	Hap-C		Hap-4A-C
76	KRL1-4	Rht-B1a	Rht-D1b	vrn-A1	vrn-B1	vrn-D1	Ppd-D1b	PH-2La	PH-4La	PH-5La	PH-6La	NW97S186 type	Rio Blanco type	Sdr-B1a	Vp-1Ba,b	CS type	CS/Jagger type	Dreb-B1a	Lr14-	Lr34+	Lr68-	R5_Yr15-	R8_Yr15+	Fhb1_R	Fhb1-	1BL.1BL	Null	Glu-D1a	Pina-D1a	Pinb-D1b	Pinb-B2b	TaSBEIII-C	GS-D1a	Hap-L	Hap-A	Hap-1	1599-T	1185-T	Hap-C	Hap-A	Hap-4A-T
77	ISD215	Rht-B1b	Rht-D1a	vrn-A1	vrn-B1	Vrn-D1a	Ppd-D1b	PH-2La	PH-4La	PH-5La	PH-6La	NW97S186 type	Rio Blanco type	Sdr-B1b	Vp-1Ba,b	CS type	CS/Jagger type	Dreb-B1a	Lr14+	Lr34-	Lr68-	R5_Yr15-	R8_Yr15+	Fhb1_R	Fhb1-	1BL.1BL	Null	Glu-D1a	Pina-D1b	Pinb-D1a	Pinb-B2b	TaSBEIII-C	GS-D1a	Hap-L	Hap-A	Hap-1	1599-T	1185-T	Hap-C	Hap-G	Hap-4A-C
78	WH1061	Rht-B1a	Rht-D1a	vrn-A1	vrn-B1	Vrn-D1a	Ppd-D1b	PH-2La	PH-4La	PH-5La	PH-6Lb	Rio Blanco type	Rio Blanco type	Sdr-B1a	Vp-1Ba,b	CS type	CS/Jagger type	Dreb-B1a	Lr14-	Lr34+	Lr68+	R5_Yr15-	R8_Yr15+	Fhb1_R	Fhb1-	1BL.1BL	Null	Glu-D1a	Pina-D1b	Pinb-D1a	Pinb-B2b	TaSBEIII-C	GS-D1a	Hap-L	Hap-A	Hap-1	1599-T	1185-T	Hap-C	Hap-G	Hap-4A-C
79	HD3086	Rht-B1b	Rht-D1a	vrn-A1	vrn-B1	vrn-D1	Ppd-D1b	PH-2La	PH-4Lb	PH-5Lb	PH-6Lb	Rio Blanco type	Rio Blanco type	Sdr-B1b	Vp-1Ba,b	CS type	CS/Jagger type	Dreb-B1a	Lr14-	Lr34+	Lr68+	R5_Yr15-	R8_Yr15+	Fhb1_R	Fhb1-	1BL.1BL	Null	Glu-D1a	Pina-D1b	Pinb-D1b	Pinb-B2b	TaSBEIII-C	GS-D1a	Hap-L	Hap-A	Hap-1	1599-A	1185-T	Hap-C	Hap-G	Hap-4A-C
80	MACS6222	Rht-B1b	Rht-D1a	vrn-A1	vrn-B1	vrn-D1	Ppd-D1a	PH-2La	PH-4La	PH-5La	PH-6La	Rio Blanco type	Rio Blanco type	Sdr-B1a	Vp-1Bc	Jagger type	Zen type	Dreb-B1a	Lr14-	Lr34+	Lr68-	R5_Yr15+	R8_Yr15+	Fhb1_R	Fhb1-	1BL.1BL	Null	Glu-D1a	Pina-D1b	Pinb-D1a	Pinb-B2b	TaSBEIII-C	GS-D1a	Hap-H	Hap-A	Hap-1	1599-T	1185-T	Hap-C	Hap-A	Hap-4A-C
81	BNI ROELFS	Rht-B1a	Rht-D1a	vrn-A1	vrn-B1	Vrn-D1a	Ppd-D1b	PH-2Lb	PH-4Lb	PH-5Lb	PH-6Lb	Rio Blanco type	Rio Blanco type	Sdr-B1a	Vp-1Ba,b	CS type	CS/Jagger type	Dreb-B1a	Lr14+	Lr34+	Lr68+	R5_Yr15-	R8_Yr15+	Fhb1_R	Fhb1+	1BL.1BL	Null	Glu-D1d	Pina-D1b	Pinb-D1a	Pinb-B2b	TaSBEIII-C	GS-D1a	Hap-L	Hap-A	Hap-1	1599-T	1185-T	Hap-C	Hap-G	Hap-4A-C
82	KRL35	Rht-B1b	Rht-D1a	vrn-A1	vrn-B1	Vrn-D1a	Ppd-D1b	PH-2Lb	PH-4Lb	PH-5Lb	PH-6Lb	Rio Blanco type	Rio Blanco type	Sdr-B1b	Vp-1Ba,b	CS type	CS/Jagger type	Dreb-B1a	Lr14+	Lr34-	Lr68-	R5_Yr15-	R8_Yr15+	Fhb1_R	Fhb1-	1BL.1BL	Null	Glu-D1a	Pina-D1b	Pinb-D1a	Pinb-B2b	TaSBEIII-C	GS-D1a	Hap-L	Hap-A	Hap-1	1599-T	1185-T	Hap-C	Hap-G	Hap-4A-C
83	FLW11	Rht-B1b	Rht-D1a	Vrn-A1a	vrn-B1	vrn-D1	Ppd-D1b	PH-2Lb	PH-4Lb	PH-5Lb	PH-6Lb	Rio Blanco type	Rio Blanco type	Sdr-B1b	Vp-1Ba,b	CS type	CS/Jagger type	Dreb-B1a	Lr14+	Lr34+	Lr68-	R5_Yr15-	R8_Yr15+	Fhb1_R	Fhb1-	1BL.1BL	Ax1 or Ax2*	Glu-D1a	Pina-D1b	Pinb-D1a	Pinb-B2b	TaSBEIII-C	GS-D1a	Hap-L	Hap-A	Hap-1	1599-T	1185-T	Hap-C	Hap-G	Hap-4A-C
84	FLW13	Rht-B1a	Rht-D1a	vrn-A1	vrn-B1	vrn-D1	Ppd-D1a	PH-2La	PH-4La	PH-5La	PH-6La	Rio Blanco type	Rio Blanco type	Sdr-B1a	Vp-1Bc	Jagger type	Zen type	Dreb-B1a	Lr14+	Lr34+	Lr68-	R5_Yr15+	R8_Yr15+	Fhb1_R	Fhb1-	1BL.1BL	Ax1 or Ax2*	Glu-D1a	Pina-D1b	Pinb-D1a	Pinb-B2b	TaSBEIII-C	GS-D1a	Hap-L	Hap-G	Others	1599-T	1185-T	Hap-T	Hap-A	Hap-4A-C
85	HI1500	Rht-B1a	Rht-D1b	Vrn-A1a	Vrn-B1b	vrn-D1	Ppd-D1a	PH-2Lb	PH-4Lb	PH-5Lb	PH-6Lb	NW97S186 type	NW97S186 type	Sdr-B1a	Vp-1Bc	CS type	Zen type	Dreb-B1a	Lr14-	Lr34+	Lr68-	R5_Yr15-	R8_Yr15-	Fhb1_R	Fhb1+	1BL.1BL	Ax1 or Ax2*	Glu-D1a	Pina-D1b	Pinb-D1a	Pinb-B2b	TaSBEIII-T	GS-D1a	Hap-L	Hap-A	Hap-1	1599-A	1185-T	Hap-C	Hap-G	Hap-4A-C
86	HD3016	Rht-B1b	Rht-D1a	Vrn-A1a	vrn-B1	Vrn-D1a	Ppd-D1b	PH-2Lb	PH-4Lb	PH-5Lb	PH-6Lb	Rio Blanco type	Rio Blanco type	Sdr-B1b	Vp-1Ba,b	CS type	CS/Jagger type	Dreb-B1a	Lr14+	Lr34+	Lr68+	R5_Yr15-	R8_Yr15+	Fhb1_R	Fhb1-	1BL.1BL	Null	Glu-D1a	Pina-D1b	Pinb-D1a	Pinb-B2b	TaSBEIII-C	GS-D1a	Hap-L	Hap-A	Hap-1	1599-A	1185-T	Hap-C	Hap-G	Hap-4A-C
87	K1213	Rht-B1b	Rht-D1a	Vrn-A1a	vrn-B1	Vrn-D1a	Ppd-D1b	PH-2Lb	PH-4Lb	PH-5Lb	PH-6Lb	NW97S186 type	NW97S186 type	Sdr-B1b	Vp-1Ba,b	CS type	CS/Jagger type	Dreb-B1a	Lr14-	Lr34-	Lr68-	R5_Yr15-	R8_Yr15+	Fhb1_R	Fhb1-	1BL.1BL	Null	Glu-D1a	Pina-D1b	Pinb-D1a	Pinb-B2b	TaSBEIII-C	GS-D1a	Hap-L	Hap-A	Hap-1	1599-A	1185-T	Hap-C	Hap-A	Hap-4A-C
88	RAJ4356	Rht-B1b	Rht-D1a	Vrn-A1a	vrn-B1	Vrn-D1a	Ppd-D1b	PH-2Lb	PH-4Lb	PH-5Lb	PH-6Lb	NW97S186 type	NW97S186 type	Sdr-B1b	Vp-1Ba,b	CS type	CS/Jagger type	Dreb-B1a	Lr14+	Lr34-	Lr68-	R5_Yr15-	R8_Yr15+	Fhb1_R	Fhb1-	1BL.1BL	Null	Glu-D1a	Pina-D1b	Pinb-D1a	Pinb-B2b	TaSBEIII-C	GS-D1a	Hap-L	Hap-A	Hap-1	1599-A	1185-C	Hap-C	Hap-A	Hap-4A-C
89	BNI DBW222	Rht-B1a	Rht-D1b	vrn-A1	vrn-B1	Vrn-D1a	Ppd-D1b	PH-2Lb	PH-4Lb	PH-5Lb	PH-6Lb	NW97S186 type	NW97S186 type	Sdr-B1b	Vp-1Ba,b	CS type	CS/Jagger type	Dreb-B1a	Lr14-	Lr34+	Lr68-	R5_Yr15-	R8_Yr15+	Fhb1_R	Fhb1-	1BL.1BL	Null	Glu-D1a	Pina-D1b	Pinb-D1a	Pinb-B2b	TaSBEIII-C	GS-D1a	Hap-L	Hap-A	Hap-1	1599-T	1185-T	Hap-C	Hap-A	Hap-4A-C
90	D14	Rht-B1a	Rht-D1a	vrn-A1	vrn-B1	Vrn-D1a	Ppd-D1b	PH-2Lb	PH-4Lb	PH-5Lb	PH-6Lb	Rio Blanco type	Rio Blanco type	Sdr-B1b	Vp-1Ba,b	CS type	CS/Jagger type	Dreb-B1a	Lr14-	Lr34+	Lr68-	R5_Yr15-	R8_Yr15+	Fhb1_R	Fhb1-	1BL.1BL	Null	Glu-D1a	Pina-D1b	Pinb-D1a	Pinb-B2b	TaSBEIII-C	GS-D1b	Hap-L	Hap-A	Hap-1	1599-T	1185-T	Hap-C	Hap-A	Hap-4A-C
91	LOK1	Rht-B1a	Rht-D1a	Vrn-A1a	vrn-B1	Vrn-D1a	Ppd-D1b	PH-2Lb	PH-4Lb	PH-5Lb	PH-6Lb	NW97S186 type	NW97S186 type	Sdr-B1a	Vp-1Bc	CS type	CS/Jagger type	Dreb-B1a	Lr14-	Lr34-	Lr68-	R5_Yr15-	R8_Yr15+	Fhb1_R	Fhb1-	1BL.1BL	Null	Glu-D1a	Pina-D1a	Pinb-D1b	Pinb-B2b	TaSBEIII-C	GS-D1a	Hap-L	Hap-A	Hap-1	1599-T	1185-T	Hap-C	Hap-G	Hap-4A-C
92	WH542	Rht-B1a	Rht-D1b	vrn-A1	vrn-B1	Vrn-D1a	Ppd-D1b	PH-2Lb	PH-4Lb	PH-5Lb	PH-6Lb	NW97S186 type	NW97S186 type	Sdr-B1a	Vp-1Ba,b	CS type	CS/Jagger type	Dreb-B1a	Lr14+	Lr34-	Lr68-	R5_Yr15-	R8_Yr15+	Fhb1_R	Fhb1-	1BL.1BL	Null	Glu-D1a	Pina-D1b	Pinb-D1a	Pinb-B2b	TaSBEIII-C	GS-D1a	Hap-L	Hap-A	Hap-1	1599-A	1185-C	Hap-C	Hap-A	Hap-4A-C
93	DBW327	Rht-B1b	Rht-D1b	vrn-A1	vrn-B1	Vrn-D1a	Ppd-D1b	PH-2Lb	PH-4Lb	PH-5Lb	PH-6Lb	Rio Blanco type	Rio Blanco type	Sdr-B1a	Vp-1Ba,b	CS type	Zen type	Dreb-B1a	Lr14+	Lr34+	Lr68+	R5_Yr15-	R8_Yr15+	Fhb1_R	Fhb1-	1BL.1BL	Null	Glu-D1d	Pina-D1b	Pinb-D1a	Pinb-B2b	TaSBEIII-C	GS-D1a	Hap-L	Hap-A	Others	1599-A	1185-C	Hap-C	Hap-G	Hap-4A-T
94	D127	Rht-B1b	Rht-D1b	vrn-A1	Vrn-B1b	Vrn-D1a	Ppd-D1b	PH-2Lb	PH-4Lb	PH-5Lb	PH-6Lb	NW97S186 type	NW97S186 type	Sdr-B1a	Vp-1Ba,b	CS type	CS/Jagger type	Dreb-B1a	Lr14+	Lr34+	Lr68+	R5_Yr15+	R8_Yr15+	Fhb1_R	Fhb1+	1BL.1BL	Null	Glu-D1a	Pina-D1b	Pinb-D1b	Pinb-B2b	TaSBEIII-T	GS-D1a	Hap-L	Hap-A	Hap-1	1599-T	1185-T	Hap-T	Hap-G	Hap-4A-C
95	ALDAN	Rht-B1a	Rht-D1b	vrn-A1	vrn-B1	Vrn-D1a	Ppd-D1b	PH-2Lb	PH-4Lb	PH-5Lb	PH-6Lb	NW97S186 type	NW97S186 type	Sdr-B1a	Vp-1Bc	CS type	CS/Jagger type	Dreb-B1a	Lr14+	Lr34+	Lr68-	R5_Yr15-	R8_Yr15+	Fhb1_R	Fhb1-	1BL.1BL	Null	Glu-D1a	Pina-D1a	Pinb-D1b	Pinb-B2b	TaSBEIII-C	GS-D1a	Hap-L	Hap-A	Hap-1	1599-T	1185-C	Hap-C	Hap-A	Hap-4A-C
96	GL23	Rht-B1a	Rht-D1b	vrn-A1	vrn-B1	vrn-D1	Ppd-D1b	PH-2Lb	PH-4Lb	PH-5Lb	PH-6Lb	Rio Blanco type	NW97S186 type	Sdr-B1a	Vp-1Ba,b	CS type	CS/Jagger type	Dreb-B1a	Lr14+	Lr34+	Lr68+	R5_Yr15-	R8_Yr15+	Fhb1_R	Fhb1-	1BL.1BL	Null	Glu-D1a	Pina-D1b	Pinb-D1a	Pinb-B2b	TaSBEIII-C	GS-D1a	Hap-L	Hap-A	Hap-1	1599-T	1185-T	Hap-C	Hap-G	Hap-4A-C
97	YR10	Rht-B1a	Rht-D1a	vrn-A1	vrn-B1	vrn-D1	Ppd-D1b	PH-2Lb	PH-4Lb	PH-5Lb	PH-6Lb	Rio Blanco type	NW97S186 type	Sdr-B1a	Vp-1Ba,b	CS type	CS/Jagger type	Dreb-B1a	Lr14+	Lr34-	Lr68-	R5_Yr15-	R8_Yr15+	Fhb1_R	Fhb1+	1BL.1BL	Ax1 or Ax2*	Glu-D1a	Pina-D1a	Pinb-D1a	Pinb-B2b	TaSBEIII-C	GS-D1a	Hap-L	Hap-A	Hap-1	1599-T	1185-C	Hap-C	Hap-G	Hap-4A-C
98	YR15	Rht-B1a	Rht-D1a	vrn-A1	vrn-B1	vrn-D1	Ppd-D1b	PH-2Lb	PH-4Lb	PH-5Lb	PH-6Lb	Rio Blanco type	Rio Blanco type	Sdr-B1b	Vp-1Ba,b	CS type	CS/Jagger type	Dreb-B1a	Lr14+	Lr34-	Lr68-	R5_Yr15+	R8_Yr15+	Fhb1_R	Fhb1-	1BL.1BL	Ax1 or Ax2*	Glu-D1a	Pina-D1a	Pinb-D1a	Pinb-B2b	TaSBEIII-C	GS-D1a	Hap-L	Hap-A	Hap-1	1599-T	1185-T	Hap-C	Hap-G	Hap-4A-C
99	IC322007A	Rht-B1a	Rht-D1b	Vrn-A1a	Vrn-B1b	Vrn-D1a	Ppd-D1a	PH-2Lb	PH-4Lb	PH-5Lb	PH-6Lb	NW97S186 type	NW97S186 type	Sdr-B1a	Vp-1Ba,b	CS type	Zen type	Dreb-B1b	Lr14-	Lr34-	Lr68-	R5_Yr15+	R8_Yr15+	Fhb1_R	Fhb1-	1BL.1BL	Null	Glu-D1a	Pina-D1a	Pinb-D1b	Pinb-B2b	TaSBEIII-T	GS-D1a	Hap-L	Hap-A	Hap-1	1599-T	1185-T	Hap-C	Hap-A	Hap-4A-C
100	NB29-13-5-9	Rht-B1a	Rht-D1a	vrn-A1	vrn-B1	vrn-D1	Ppd-D1a	PH-2Lb	PH-4Lb	PH-5Lb	PH-6Lb	Rio Blanco type	Rio Blanco type	Sdr-B1b	Vp-1Ba,b	CS type	CS/Jagger type	Dreb-B1a	Lr14+	Lr34+	Lr68-	R5_Yr15-	R8_Yr15+	Fhb1_R	Fhb1-	1BL.1BL	Ax1 or Ax2*	Glu-D1a	Pina-D1a	Pinb-D1a	Pinb-B2b	TaSBEIII-C	GS-D1a	Hap-L	Hap-A	Hap-1	1599-T	1185-T	Hap-C	Hap-A	Hap-4A-C
101	MP3288	Rht-B1a	Rht-D1b	vrn-A1	Vrn-B1b	vrn-D1	Ppd-D1b	PH-2Lb	PH-4Lb	PH-5Lb	PH-6Lb	NW97S186 type	NW97S186 type	Sdr-B1b	Vp-1Ba,b	CS type	CS/Jagger type	Dreb-B1a	Lr14-	Lr34-	Lr68-	R5_Yr15-	R8_Yr15+	Fhb1_R	Fhb1-	1BL.1BL	Null	Glu-D1a	Pina-D1b	Pinb-D1a	Pinb-B2b	TaSBEIII-C	GS-D1a	Hap-L	Hap-A	Hap-1	1599-A	1185-C	Hap-C	Hap-A	Hap-4A-C
102	PBW723	Rht-B1b	Rht-D1b	vrn-A1	vrn-B1	vrn-D1	Ppd-D1b	PH-2Lb	PH-4Lb	PH-5Lb	PH-6Lb	NW97S186 type	NW97S186 type	Sdr-B1a	Vp-1Ba,b	CS type	CS/Jagger type	Dreb-B1a	Lr14+	Lr34+	Lr68+	R5_Yr15+	R8_Yr15+	Fhb1_R	Fhb1-	1BL.1BL	Null	Glu-D1a	Pina-D1a	Pinb-D1a	Pinb-B2b	TaSBEIII-T	GS-D1a	Hap-L	Hap-A	Hap-1	1599-T	1185-T	Hap-T	Hap-A	Hap-4A-C
103	D22	Rht-B1b	Rht-D1a	vrn-A1	Vrn-B1b	Vrn-D1a	Ppd-D1b	PH-2Lb	PH-4Lb	PH-5Lb	PH-6Lb	Rio Blanco type	Rio Blanco type	Sdr-B1b	Vp-1Ba,b	CS type	CS/Jagger type	Dreb-B1a	Lr14-	Lr34+	Lr68-	R5_Yr15-	R8_Yr15+	Fhb1_R	Fhb1+	1BL.1BL	Null	Glu-D1a	Pina-D1b	Pinb-D1b	Pinb-B2b	TaSBEIII-C	GS-D1a	Hap-L	Hap-A	Hap-1	1599-A	1185-T	Hap-C	Hap-A	Hap-4A-C
104	WL711	Rht-B1a	Rht-D1b	vrn-A1	Vrn-B1b	Vrn-D1a	Ppd-D1b	PH-2Lb	PH-4Lb	PH-5Lb	PH-6Lb	NW97S186 type	NW97S186 type	Sdr-B1a	Vp-1Ba,b	CS type	CS/Jagger type	Dreb-B1a	Lr14-	Lr34+	Lr68-	R5_Yr15-	R8_Yr15+	Fhb1_R	Fhb1-	1BL.1BL	Null	Glu-D1a	Pina-D1a	Pinb-D1b	Pinb-B2b	TaSBEIII-C	GS-D1a	Hap-L	Hap-A	Hap-1	1599-T	1185-T	Hap-C	Hap-A	Hap-4A-C
105	HI1579	Rht-B1a	Rht-D1b	Vrn-A1a	Vrn-B1b	vrn-D1	Ppd-D1b	PH-2Lb	PH-4Lb	PH-5Lb	PH-6Lb	NW97S186 type	Rio Blanco type	Sdr-B1a	Vp-1Ba,b	CS type	CS/Jagger type	Dreb-B1a	Lr14+	Lr34+	Lr68-	R5_Yr15-	R8_Yr15+	Fhb1_R	Fhb1-	1BL.1BL	Null	Glu-D1a	Pina-D1b	Pinb-D1a	Pinb-B2b	TaSBEIII-T	GS-D1a	Hap-L	Hap-A	Hap-1	1599-A	1185-T	Hap-C	Hap-A	Hap-4A-C
106	DBW316	Rht-B1a	Rht-D1b	Vrn-A1a	Vrn-B1b	vrn-D1	Ppd-D1b	PH-2Lb	PH-4Lb	PH-5Lb	PH-6Lb	Rio Blanco type	Rio Blanco type	Sdr-B1a	Vp-1Ba,b	CS type	CS/Jagger type	Dreb-B1a	Lr14-	Lr34+	Lr68-	R5_Yr15-	R8_Yr15+	Fhb1_R	Fhb1-	1BL.1BL	Null	Glu-D1a	Pina-D1b	Pinb-D1a	Pinb-B2b	TaSBEIII-C	GS-D1a	Hap-L	Hap-A	Hap-1	1599-A	1185-T	Hap-C	Hap-A	Hap-4A-C
107	DL1266-5	Rht-B1b	Rht-D1b	Vrn-A1a	Vrn-B1b	vrn-D1	Ppd-D1b	PH-2Lb	PH-4Lb	PH-5Lb	PH-6Lb	NW97S186 type	NW97S186 type	Sdr-B1b	Vp-1Ba,b	CS type	Zen type	Dreb-B1a	Lr14+	Lr34-	Lr68-	R5_Yr15-	R8_Yr15+	Fhb1_R	Fhb1-	1BL.1BL	Null	Glu-D1a	Pina-D1b	Pinb-D1a	Pinb-B2b	TaSBEIII-C	GS-D1a	Hap-L	Hap-A	Hap-1	1599-T	1185-C	Hap-C	Hap-A	Hap-4A-C
108	FKW1	Rht-B1a	Rht-D1a	vrn-A1	Vrn-B1b	vrn-D1	Ppd-D1a	PH-2Lb	PH-4Lb	PH-5Lb	PH-6Lb	NW97S186 type	Rio Blanco type	Sdr-B1b	Vp-1Ba,b	CS type	CS/Jagger type	Dreb-B1a	Lr14-	Lr34+	Lr68-	R5_Yr15-	R8_Yr15+	Fhb1_R	Fhb1-	1BL.1BL	Ax1 or Ax2*	Glu-D1a	Pina-D1b	Pinb-D1a	Pinb-B2b	TaSBEIII-C	GS-D1a	Hap-L	Hap-A	Hap-1	1599-T	1185-T	Hap-C	Hap-G	Hap-4A-C
109	DBW252	Rht-B1b	Rht-D1b	Vrn-A1a	vrn-B1	Vrn-D1a	Ppd-D1b	PH-2Lb	PH-4Lb	PH-5Lb	PH-6Lb	NW97S186 type	NW97S186 type	Sdr-B1b	Vp-1Bc	CS type	Zen type	Dreb-B1b	Lr14-	Lr34+	Lr68-	R5_Yr15-	R8_Yr15-	Fhb1_S3	Fhb1+	1BL.1RS	Ax1 or Ax2*	Glu-D1a	Pina-D1b	Pinb-D1a	Pinb-B2b	TaSBEIII-C	GS-D1a	Hap-H	Hap-A	Hap-1	1599-A	1185-T	Hap-C	Hap-G	Hap-4A-C
110	DBW39	Rht-B1a	Rht-D1b	Vrn-A1a	Vrn-B1b	Vrn-D1a	Ppd-D1b	PH-2Lb	PH-4Lb	PH-5Lb	PH-6Lb	NW97S186 type	NW97S186 type	Sdr-B1b	Vp-1Bc	CS type	Zen type	Dreb-B1b	Lr14-	Lr34-	Lr68+	R5_Yr15-	R8_Yr15-	Fhb1_R	Fhb1+	1BL.1BL	Null	Glu-D1a	Pina-D1b	Pinb-D1a	Pinb-B2b	TaSBEIII-C	GS-D1a	Hap-H	Hap-A	Hap-1	1599-A	1185-T	Hap-C	Hap-G	Hap-4A-C
111	CPAN3045	Rht-B1a	Rht-D1b	vrn-A1	vrn-B1	Vrn-D1a	Ppd-D1b	PH-2La	PH-4Lb	PH-5La	PH-6Lb	NW97S186 type	NW97S186 type	Sdr-B1a	Vp-1Ba,b	CS type	CS/Jagger type	Dreb-B1a	Lr14-	Lr34-	Lr68-	R5_Yr15-	R8_Yr15+	Fhb1_R	Fhb1+	1BL.1BL	Null	Glu-D1a	Pina-D1a	Pinb-D1b	Pinb-B2b	TaSBEIII-C	GS-D1a	Hap-L	Hap-A	Hap-1	1599-T	1185-T	Hap-C	Hap-G	Hap-4A-C
112	IC322001	Rht-B1a	Rht-D1a	Vrn-A1a	Vrn-B1b	Vrn-D1a	Ppd-D1a	PH-2La	PH-4La	PH-5La	PH-6La	Rio Blanco type	Rio Blanco type	Sdr-B1a	Vp-1Bc	CS type	Zen type	Dreb-B1b	Lr14-	Lr34-	Lr68-	R5_Yr15+	R8_Yr15+	Fhb1_R	Fhb1+	1BL.1BL	Null	Glu-D1a	Pina-D1b	Pinb-D1a	Pinb-B2b	TaSBEIII-T	GS-D1a	Hap-L	Hap-A	Hap-1	1599-T	1185-T	Hap-C	Hap-G	Hap-4A-C
113	HD2967	Rht-B1b	Rht-D1b	vrn-A1	vrn-B1	vrn-D1	Ppd-D1b	PH-2La	PH-4Lb	PH-5Lb	PH-6Lb	NW97S186 type	NW97S186 type	Sdr-B1b	Vp-1Ba,b	CS type	Zen type	Dreb-B1a	Lr14+	Lr34+	Lr68+	R5_Yr15+	R8_Yr15+	Fhb1_R	Fhb1+	1BL.1RS	Null	Glu-D1a	Pina-D1b	Pinb-D1b	Pinb-B2b	TaSBEIII-T	GS-D1a	Hap-L	Hap-A	Hap-1	1599-T	1185-T	Hap-T	Hap-A	Hap-4A-C
114	DPW621-50	Rht-B1b	Rht-D1b	Vrn-A1a	vrn-B1	vrn-D1	Ppd-D1b	PH-2Lb	PH-4Lb	PH-5Lb	PH-6Lb	NW97S186 type	NW97S186 type	Sdr-B1b	Vp-1Bc	CS type	Zen type	Dreb-B1b	Lr14-	Lr34+	Lr68+	R5_Yr15-	R8_Yr15+	Fhb1_R	Fhb1+	1BL.1RS	Null	Glu-D1a	Pina-D1b	Pinb-D1a	Pinb-B2b	TaSBEIII-C	GS-D1a	Hap-H	Hap-A	Hap-1	1599-A	1185-T	Hap-C	Hap-G	Hap-4A-C
115	DBW377	Rht-B1b	Rht-D1b	vrn-A1	vrn-B1	Vrn-D1a	Ppd-D1b	PH-2Lb	PH-4Lb	PH-5Lb	PH-6Lb	NW97S186 type	NW97S186 type	Sdr-B1b	Vp-1Ba,b	CS type	CS/Jagger type	Dreb-B1b	Lr14-	Lr34+	Lr68+	R5_Yr15-	R8_Yr15+	Fhb1_R	Fhb1-	1BL.1RS	Null	Glu-D1a	Pina-D1b	Pinb-D1a	Pinb-B2b	TaSBEIII-T	GS-D1a	Hap-L	Hap-G	Hap-1	1599-A	1185-T	Hap-C	Hap-A	Hap-4A-C
116	HD30	Rht-B1b	Rht-D1b	vrn-A1	vrn-B1	Vrn-D1a	Ppd-D1b	PH-2Lb	PH-4Lb	PH-5Lb	PH-6Lb	NW97S186 type	NW97S186 type	Sdr-B1b	Vp-1Bc	CS type	Zen type	Dreb-B1b	Lr14-	Lr34+	Lr68+	R5_Yr15-	R8_Yr15+	Fhb1_R	Fhb1+	1BL.1RS	Null	Glu-D1a	Pina-D1b	Pinb-D1a	Pinb-B2b	TaSBEIII-C	GS-D1a	Hap-L	Hap-A	Hap-1	1599-A	1185-T	Hap-C	Hap-G	Hap-4A-C
117	IC321979	Rht-B1b	Rht-D1b	vrn-A1	vrn-B1	Vrn-D1a	Ppd-D1b	PH-2Lb	PH-4Lb	PH-5Lb	PH-6Lb	NW97S186 type	NW97S186 type	Sdr-B1b	Vp-1Bc	CS type	Zen type	Dreb-B1b	Lr14-	Lr34+	Lr68+	R5_Yr15-	R8_Yr15-	Fhb1_R	Fhb1+	1BL.1RS	Null	Glu-D1a	Pina-D1b	Pinb-D1a	Pinb-B2b	TaSBEIII-C	GS-D1a	Hap-L	Hap-A	Hap-1	1599-A	1185-T	Hap-C	Hap-A	Hap-4A-C
118	HD29	Rht-B1a	Rht-D1a	vrn-A1	vrn-B1	Vrn-D1a	Ppd-D1a	PH-2Lb	PH-4Lb	PH-5Lb	PH-6Lb	NW97S186 type	NW97S186 type	Sdr-B1b	Vp-1Ba,b	CS type	CS/Jagger type	Dreb-B1b	Lr14-	Lr34+	Lr68+	R5_Yr15-	R8_Yr15-	Fhb1_R	Fhb1+	1BL.1RS	Null	Glu-D1a	Pina-D1a	Pinb-D1b	Pinb-B2b	TaSBEIII-T	GS-D1a	Hap-L	Hap-G	Hap-1	1599-A	1185-T	Hap-C	Hap-G	Hap-4A-C
119	DBW50	Rht-B1a	Rht-D1b	vrn-A1	vrn-B1	Vrn-D1a	Ppd-D1b	PH-2Lb	PH-4Lb	PH-5Lb	PH-6Lb	NW97S186 type	NW97S186 type	Sdr-B1a	Vp-1Ba,b	CS type	CS/Jagger type	Dreb-B1a	Lr14-	Lr34+	Lr68-	R5_Yr15-	R8_Yr15+	Fhb1_R	Fhb1-	1BL.1RS	Null	Glu-D1d	Pina-D1b	Pinb-D1a	Pinb-B2b	TaSBEIII-C	GS-D1a	Hap-L	Hap-A	Hap-1	1599-A	1185-T	Hap-C	Hap-G	Hap-4A-C
120	PBW827	Rht-B1a	Rht-D1b	vrn-A1	vrn-B1	Vrn-D1a	Ppd-D1b	PH-2Lb	PH-4Lb	PH-5Lb	PH-6Lb	NW97S186 type	NW97S186 type	Sdr-B1a	Vp-1Ba,b	CS type	CS/Jagger type	Dreb-B1b	Lr14+	Lr34+	Lr68+	R5_Yr15-	R8_Yr15+	Fhb1_S3	Fhb1-	1BL.1RS	Null	Glu-D1a	Pina-D1b	Pinb-D1a	Pinb-B2b	TaSBEIII-T	GS-D1a	Hap-L	Hap-A	Hap-1	1599-A	1185-C	Hap-C	Hap-A	Hap-4A-C
121	PBW660	Rht-B1a	Rht-D1b	Vrn-A1a	vrn-B1	Vrn-D1a	Ppd-D1b	PH-2Lb	PH-4Lb	PH-5Lb	PH-6Lb	NW97S186 type	NW97S186 type	Sdr-B1a	Vp-1Bc	CS type	Zen type	Dreb-B1a	Lr14-	Lr34-	Lr68+	R5_Yr15-	R8_Yr15+	Fhb1_R	Fhb1-	1BL.1BL	Null	Glu-D1a	Pina-D1b	Pinb-D1b	Pinb-B2b	TaSBEIII-T	GS-D1a	Hap-L	Hap-A	Hap-1	1599-A	1185-T	Hap-C	Hap-A	Hap-4A-C
122	RIL1	Rht-B1a	Rht-D1b	vrn-A1	vrn-B1	Vrn-D1a	Ppd-D1b	PH-2Lb	PH-4Lb	PH-5Lb	PH-6Lb	NW97S186 type	NW97S186 type	Sdr-B1a	Vp-1Ba,b	CS type	CS/Jagger type	Dreb-B1a	Lr14+	Lr34+	Lr68-	R5_Yr15-	R8_Yr15+	Fhb1_R	Fhb1-	1BL.1RS	Null	Glu-D1a	Pina-D1b	Pinb-D1a	Pinb-B2b	TaSBEIII-C	GS-D1a	Hap-L	Hap-A	Hap-1	1599-A	1185-C	Hap-C	Hap-A	Hap-4A-C
123	DTS16	Rht-B1a	Rht-D1b	vrn-A1	vrn-B1	Vrn-D1a	Ppd-D1b	PH-2Lb	PH-4Lb	PH-5Lb	PH-6Lb	NW97S186 type	NW97S186 type	Sdr-B1b	Vp-1Ba,b	CS type	CS/Jagger type	Dreb-B1a	Lr14-	Lr34+	Lr68-	R5_Yr15-	R8_Yr15+	Fhb1_R	Fhb1-	1BL.1BL	Null	Glu-D1a	Pina-D1b	Pinb-D1b	Pinb-B2b	TaSBEIII-T	GS-D1a	Hap-L	Hap-A	Hap-1	1599-T	1185-C	Hap-C	Hap-G	Hap-4A-C
124	DBW187	Rht-B1a	Rht-D1a	vrn-A1	vrn-B1	vrn-D1	Ppd-D1a	PH-2La	PH-4La	PH-5La	PH-6La	Rio Blanco type	Rio Blanco type	Sdr-B1a	Vp-1Bc	CS type	Zen type	Dreb-B1b	Lr14+	Lr34+	Lr68-	R5_Yr15-	R8_Yr15+	Fhb1_R	Fhb1+	1BL.1RS	Null	Glu-D1a	Pina-D1b	Pinb-D1b	Pinb-B2b	TaSBEIII-T	GS-D1a	Hap-L	Hap-A	Hap-1	1599-T	1185-C	Hap-T	Hap-A	Hap-4A-C
125	VL900	Rht-B1a	Rht-D1a	vrn-A1	vrn-B1	vrn-D1	Ppd-D1b	PH-2Lb	PH-4Lb	PH-5Lb	PH-6Lb	Rio Blanco type	Rio Blanco type	Sdr-B1a	Vp-1Ba,b	CS type	CS/Jagger type	Dreb-B1a	Lr14-	Lr34+	Lr68+	R5_Yr15-	R8_Yr15+	Fhb1_R	Fhb1-	1BL.1BL	Null	Glu-D1a	Pina-D1b	Pinb-D1a	Pinb-B2b	TaSBEIII-C	GS-D1a	Hap-L	Hap-A	Hap-1	1599-A	1185-T	Hap-C	Hap-G	Hap-4A-C
126	VL798	Rht-B1b	Rht-D1b	vrn-A1	vrn-B1	vrn-D1	Ppd-D1b	PH-2Lb	PH-4Lb	PH-5Lb	PH-6Lb	NW97S186 type	NW97S186 type	Sdr-B1a	Vp-1Ba,b	CS type	Zen type	Dreb-B1a	Lr14+	Lr34+	Lr68+	R5_Yr15+	R8_Yr15+	Fhb1_R	Fhb1-	1BL.1RS	Null	Glu-D1a	Pina-D1b	Pinb-D1a	Pinb-B2b	TaSBEIII-T	GS-D1a	Hap-L	Hap-A	Hap-1	1599-A	1185-T	Hap-T	Hap-A	Hap-4A-C
127	HI1580	Rht-B1b	Rht-D1a	vrn-A1	vrn-B1	vrn-D1	Ppd-D1b	PH-2Lb	PH-4Lb	PH-5Lb	PH-6Lb	NW97S186 type	Rio Blanco type	Sdr-B1b	Vp-1Ba,b	CS type	CS/Jagger type	Dreb-B1a	Lr14-	Lr34+	Lr68-	R5_Yr15-	R8_Yr15+	Fhb1_R	Fhb1-	1BL.1BL	Null	Glu-D1a	Pina-D1b	Pinb-D1a	Pinb-B2b	TaSBEIII-C	GS-D1a	Hap-L	Hap-A	Hap-1	1599-T	1185-T	Hap-C	Hap-A	Hap-4A-C
128	LGM133	Rht-B1a	Rht-D1a	vrn-A1	vrn-B1	vrn-D1	Ppd-D1b	PH-2Lb	PH-4Lb	PH-5Lb	PH-6Lb	Rio Blanco type	NW97S186 type	Sdr-B1a	Vp-1Bc	CS type	Zen type	Dreb-B1a	Lr14+	Lr34+	Lr68-	R5_Yr15-	R8_Yr15+	Fhb1_R	Fhb1-	1BL.1RS	Null	Glu-D1a	Pina-D1b	Pinb-D1b	Pinb-B2b	TaSBEIII-C	GS-D1a	Hap-L	Hap-A	Hap-1	1599-T	1185-C	Hap-C	Hap-A	Hap-4A-C
129	W485	Rht-B1a	Rht-D1b	vrn-A1	vrn-B1	Vrn-D1a	Ppd-D1a	PH-2Lb	PH-4Lb	PH-5Lb	PH-6Lb	NW97S186 type	NW97S186 type	Sdr-B1a	Vp-1Bc	CS type	Zen type	Dreb-B1a	Lr14-	Lr34+	Lr68+	R5_Yr15-	R8_Yr15+	Fhb1_R	Fhb1-	1BL.1BL	Null	Glu-D1a	Pina-D1a	Pinb-D1b	Pinb-B2b	TaSBEIII-T	GS-D1a	Hap-L	Hap-A	Hap-1	1599-A	1185-T	Hap-C	Hap-G	Hap-4A-C
130	SB14	Rht-B1b	Rht-D1b	Vrn-A1a	Vrn-B1b	Vrn-D1a	Ppd-D1b	PH-2Lb	PH-4Lb	PH-5Lb	PH-6Lb	NW97S186 type	NW97S186 type	Sdr-B1b	Vp-1Ba,b	CS type	Zen type	Dreb-B1b	Lr14-	Lr34+	Lr68+	R5_Yr15-	R8_Yr15-	Fhb1_R	Fhb1+	1BL.1RS	Null	Glu-D1a	Pina-D1b	Pinb-D1a	Pinb-B2b	TaSBEIII-C	GS-D1a	Hap-L	Hap-A	Hap-1	1599-A	1185-C	Hap-C	Hap-G	Hap-4A-C
131	BNI DBW187	Rht-B1b	Rht-D1b	vrn-A1	Vrn-B1b	Vrn-D1a	Ppd-D1b	PH-2Lb	PH-4Lb	PH-5Lb	PH-6Lb	NW97S186 type	NW97S186 type	Sdr-B1a	Vp-1Bc	CS type	Zen type	Dreb-B1a	Lr14-	Lr34+	Lr68-	R5_Yr15-	R8_Yr15+	Fhb1_R	Fhb1+	1BL.1BL	Null	Glu-D1a	Pina-D1b	Pinb-D1a	Pinb-B2b	TaSBEIII-T	GS-D1a	Hap-L	Hap-G	Hap-1	1599-A	1185-T	Hap-C	Hap-A	Hap-4A-C
132	IC321950	Rht-B1a	Rht-D1b	vrn-A1	Vrn-B1b	Vrn-D1a	Ppd-D1b	PH-2Lb	PH-4Lb	PH-5Lb	PH-6Lb	NW97S186 type	NW97S186 type	Sdr-B1a	Vp-1Bc	CS type	Zen type	Dreb-B1a	Lr14-	Lr34+	Lr68-	R5_Yr15-	R8_Yr15-	Fhb1_R	Fhb1+	1BL.1BL	Null	Glu-D1a	Pina-D1b	Pinb-D1a	Pinb-B2b	TaSBEIII-T	GS-D1a	Hap-L	Hap-G	Hap-1	1599-A	1185-T	Hap-C	Hap-A	Hap-4A-C
133	IC321946	Rht-B1a	Rht-D1b	vrn-A1	Vrn-B1b	Vrn-D1a	Ppd-D1b	PH-2Lb	PH-4Lb	PH-5Lb	PH-6Lb	NW97S186 type	NW97S186 type	Sdr-B1b	Vp-1Bc	CS type	Zen type	Dreb-B1a	Lr14-	Lr34+	Lr68+	R5_Yr15-	R8_Yr15-	Fhb1_R	Fhb1+	1BL.1BL	Null	Glu-D1a	Pina-D1b	Pinb-D1a	Pinb-B2b	TaSBEIII-T	GS-D1a	Hap-L	Hap-G	Hap-1	1599-A	1185-T	Hap-C	Hap-A	Hap-4A-C
134	NW1014	Rht-B1a	Rht-D1b	Vrn-A1a	Vrn-B1b	vrn-D1	Ppd-D1a	PH-2La	PH-4La	PH-5La	PH-6La	Rio Blanco type	Rio Blanco type	Sdr-B1a	Vp-1Bc	Jagger type	Zen type	Dreb-B1a	Lr14+	Lr34+	Lr68+	R5_Yr15-	R8_Yr15+	Fhb1_R	Fhb1+	1BL.1BL	Null	Glu-D1a	Pina-D1b	Pinb-D1a	Pinb-B2b	TaSBEIII-C	GS-D1a	Hap-L	Hap-G	Hap-1	1599-A	1185-C	Hap-C	Hap-G	Hap-4A-T
135	VL639	Rht-B1a	Rht-D1b	Vrn-A1a	Vrn-B1b	Vrn-D1a	Ppd-D1b	PH-2Lb	PH-4Lb	PH-5Lb	PH-6Lb	Rio Blanco type	Rio Blanco type	Sdr-B1b	Vp-1Ba,b	CS type	CS/Jagger type	Dreb-B1a	Lr14-	Lr34+	Lr68-	R5_Yr15-	R8_Yr15+	Fhb1_R	Fhb1-	1BL.1RS	Null	Glu-D1a	Pina-D1a	Pinb-D1a	Pinb-B2b	TaSBEIII-C	GS-D1a	Hap-L	Hap-A	Hap-1	1599-A	1185-T	Hap-C	Hap-G	Hap-4A-C
136	PBW674	Rht-B1a	Rht-D1b	Vrn-A1a	Vrn-B1b	Vrn-D1a	Ppd-D1b	PH-2Lb	PH-4Lb	PH-5Lb	PH-6Lb	NW97S186 type	NW97S186 type	Sdr-B1a	Vp-1Ba,b	CS type	Zen type	Dreb-B1a	Lr14+	Lr34-	Lr68+	R5_Yr15-	R8_Yr15+	Fhb1_R	Fhb1-	1BL.1BL	Null	Glu-D1a	Pina-D1b	Pinb-D1b	Pinb-B2b	TaSBEIII-T	GS-D1a	Hap-L	Hap-A	Hap-1	1599-A	1185-C	Hap-C	Hap-A	Hap-4A-C
137	DBW14	Rht-B1a	Rht-D1b	Vrn-A1a	Vrn-B1b	Vrn-D1a	Ppd-D1b	PH-2Lb	PH-4Lb	PH-5Lb	PH-6Lb	NW97S186 type	NW97S186 type	Sdr-B1a	Vp-1Bc	CS type	CS/Jagger type	Dreb-B1a	Lr14+	Lr34-	Lr68-	R5_Yr15-	R8_Yr15+	Fhb1_R	Fhb1-	1BL.1RS	Null	Glu-D1a	Pina-D1b	Pinb-D1a	Pinb-B2b	TaSBEIII-C	GS-D1a	Hap-L	Hap-G	Hap-1	1599-A	1185-C	Hap-C	Hap-A	Hap-4A-C
138	IC321984	Rht-B1a	Rht-D1b	Vrn-A1a	Vrn-B1b	Vrn-D1a	Ppd-D1b	PH-2Lb	PH-4Lb	PH-5Lb	PH-6Lb	NW97S186 type	NW97S186 type	Sdr-B1a	Vp-1Bc	CS type	Zen type	Dreb-B1a	Lr14-	Lr34+	Lr68-	R5_Yr15-	R8_Yr15+	Fhb1_R	Fhb1+	1BL.1BL	Null	Glu-D1a	Pina-D1a	Pinb-D1b	Pinb-B2b	TaSBEIII-T	GS-D1a	Hap-L	Hap-G	Hap-1	1599-A	1185-T	Hap-C	Hap-G	Hap-4A-C
139	DBW371	Rht-B1b	Rht-D1b	vrn-A1	Vrn-B1b	Vrn-D1a	Ppd-D1b	PH-2Lb	PH-4Lb	PH-5Lb	PH-6Lb	Rio Blanco type	NW97S186 type	Sdr-B1a	Vp-1Ba,b	CS type	Zen type	Dreb-B1a	Lr14-	Lr34+	Lr68+	R5_Yr15-	R8_Yr15+	Fhb1_R	Fhb1-	1BL.1BL	Null	Glu-D1d	Pina-D1b	Pinb-D1a	Pinb-B2b	TaSBEIII-T	GS-D1a	Hap-L	Hap-A	Hap-1	1599-T	1185-T	Hap-T	Hap-A	Hap-4A-C
140	HP1531	Rht-B1a	Rht-D1a	vrn-A1	Vrn-B1b	vrn-D1	Ppd-D1a	PH-2Lb	PH-4Lb	PH-5Lb	PH-6Lb	NW97S186 type	NW97S186 type	Sdr-B1b	Vp-1Ba,b	CS type	CS/Jagger type	Dreb-B1b	Lr14+	Lr34-	Lr68-	R5_Yr15-	R8_Yr15+	Fhb1_S3	Fhb1+	1BL.1BL	Ax1 or Ax2*	Glu-D1a	Pina-D1a	Pinb-D1a	Pinb-B2b	TaSBEIII-T	GS-D1a	Hap-L	Hap-A	Hap-1	1599-T	1185-T	Hap-C	Hap-A	Hap-4A-C
141	LGM139	Rht-B1a	Rht-D1a	vrn-A1	vrn-B1	Vrn-D1a	Ppd-D1a	PH-2Lb	PH-4Lb	PH-5Lb	PH-6Lb	NW97S186 type	NW97S186 type	Sdr-B1a	Vp-1Bc	CS type	CS/Jagger type	Dreb-B1b	Lr14+	Lr34+	Lr68-	R5_Yr15-	R8_Yr15+	Fhb1_R	Fhb1-	1BL.1BL	Null	Glu-D1a	Pina-D1b	Pinb-D1a	Pinb-B2b	TaSBEIII-T	GS-D1a	Hap-L	Hap-A	Hap-1	1599-T	1185-T	Hap-C	Hap-A	Hap-4A-C
142	KBRL10	Rht-B1a	Rht-D1b	vrn-A1	Vrn-B1b	Vrn-D1a	Ppd-D1a	PH-2Lb	PH-4Lb	PH-5Lb	PH-6Lb	NW97S186 type	NW97S186 type	Sdr-B1a	Vp-1Bc	CS type	Zen type	Dreb-B1a	Lr14-	Lr34+	Lr68+	R5_Yr15-	R8_Yr15+	Fhb1_R	Fhb1-	1BL.1BL	Null	Glu-D1a	Pina-D1a	Pinb-D1b	Pinb-B2b	TaSBEIII-C	GS-D1a	Hap-L	Hap-A	Hap-1	1599-T	1185-T	Hap-C	Hap-A	Hap-4A-C
143	NARMADA4	Rht-B1a	Rht-D1a	vrn-A1	Vrn-B1b	Vrn-D1a	Ppd-D1a	PH-2Lb	PH-4Lb	PH-5Lb	PH-6Lb	NW97S186 type	NW97S186 type	Sdr-B1a	Vp-1Bc	CS type	Zen type	Dreb-B1a	Lr14+	Lr34+	Lr68-	R5_Yr15-	R8_Yr15-	Fhb1_R	Fhb1+	1BL.1BL	Ax1 or Ax2*	Glu-D1a	Pina-D1b	Pinb-D1a	Pinb-B2b	TaSBEIII-T	GS-D1a	Hap-L	Hap-G	Hap-1	1599-A	1185-T	Hap-C	Hap-A	Hap-4A-C
144	IC212162	Rht-B1b	Rht-D1b	Vrn-A1a	vrn-B1	Vrn-D1a	Ppd-D1b	PH-2La	PH-4Lb	PH-5Lb	PH-6Lb	NW97S186 type	NW97S186 type	Sdr-B1b	Vp-1Bc	CS type	Zen type	Dreb-B1b	Lr14-	Lr34+	Lr68+	R5_Yr15-	R8_Yr15-	Fhb1_R	Fhb1+	1BL.1RS	Null	Glu-D1a	Pina-D1b	Pinb-D1a	Pinb-B2b	TaSBEIII-T	GS-D1a	Hap-L	Hap-G	Hap-1	1599-A	1185-T	Hap-C	Hap-A	Hap-4A-C
145	IC321998	Rht-B1a	Rht-D1b	Vrn-A1a	Vrn-B1b	Vrn-D1a	Ppd-D1a	PH-2La	PH-4Lb	PH-5Lb	PH-6Lb	NW97S186 type	NW97S186 type	Sdr-B1b	Vp-1Bc	CS type	Zen type	Dreb-B1b	Lr14-	Lr34-	Lr68+	R5_Yr15+	R8_Yr15+	Fhb1_R	Fhb1+	1BL.1RS	Null	Glu-D1a	Pina-D1b	Pinb-D1a	Pinb-B2b	TaSBEIII-T	GS-D1a	Hap-L	Hap-A	Hap-1	1599-A	1185-T	Hap-C	Hap-G	Hap-4A-C
146	COW(W)1	Rht-B1b	Rht-D1b	vrn-A1	Vrn-B1b	Vrn-D1a	Ppd-D1b	PH-2La	PH-4Lb	PH-5Lb	PH-6Lb	NW97S186 type	NW97S186 type	Sdr-B1b	Vp-1Bc	CS type	Zen type	Dreb-B1b	Lr14-	Lr34+	Lr68+	R5_Yr15-	R8_Yr15-	Fhb1_R	Fhb1-	1BL.1RS	Null	Glu-D1a	Pina-D1b	Pinb-D1a	Pinb-B2b	TaSBEIII-C	GS-D1a	Hap-L	Hap-G	Hap-1	1599-A	1185-T	Hap-C	Hap-G	Hap-4A-C
147	CHIRYA3	Rht-B1b	Rht-D1b	vrn-A1	Vrn-B1b	Vrn-D1a	Ppd-D1b	PH-2La	PH-4Lb	PH-5Lb	PH-6Lb	NW97S186 type	NW97S186 type	Sdr-B1b	Vp-1Bc	CS type	Zen type	Dreb-B1b	Lr14+	Lr34-	Lr68+	R5_Yr15-	R8_Yr15-	Fhb1_R	Fhb1+	1BL.1RS	Null	Glu-D1a	Pina-D1a	Pinb-D1a	Pinb-B2b	TaSBEIII-C	GS-D1a	Hap-L	Hap-A	Hap-1	1599-A	1185-T	Hap-C	Hap-G	Hap-4A-C
148	RIL110	Rht-B1a	Rht-D1b	Vrn-A1a	Vrn-B1b	Vrn-D1a	Ppd-D1b	PH-2Lb	PH-4Lb	PH-5Lb	PH-6La	Rio Blanco type	Rio Blanco type	Sdr-B1a	Vp-1Ba,b	CS type	CS/Jagger type	Dreb-B1b	Lr14+	Lr34+	Lr68+	R5_Yr15-	R8_Yr15+	Fhb1_R	Fhb1+	1BL.1RS	Null	Glu-D1a	Pina-D1b	Pinb-D1a	Pinb-B2b	TaSBEIII-C	GS-D1a	Hap-H	Hap-A	Hap-1	1599-A	1185-T	Hap-C	Hap-G	Hap-4A-C
149	DTS15	Rht-B1b	Rht-D1b	vrn-A1	Vrn-B1b	vrn-D1	Ppd-D1b	PH-2Lb	PH-4Lb	PH-5Lb	PH-6Lb	NW97S186 type	NW97S186 type	Sdr-B1b	Vp-1Bc	CS type	Zen type	Dreb-B1b	Lr14+	Lr34+	Lr68+	R5_Yr15-	R8_Yr15-	Fhb1_R	Fhb1+	1BL.1RS	Null	Glu-D1a	Pina-D1a	Pinb-D1a	Pinb-B2b	TaSBEIII-T	GS-D1a	Hap-H	Hap-A	Hap-1	1599-A	1185-T	Hap-C	Hap-A	Hap-4A-C
150	GL6	Rht-B1a	Rht-D1b	vrn-A1	Vrn-B1b	vrn-D1	Ppd-D1a	PH-2Lb	PH-4Lb	PH-5Lb	PH-6Lb	NW97S186 type	NW97S186 type	Sdr-B1b	Vp-1Bc	CS type	Zen type	Dreb-B1b	Lr14-	Lr34+	Lr68+	R5_Yr15-	R8_Yr15-	Fhb1_R	Fhb1+	1BL.1RS	Ax1 or Ax2*	Glu-D1a	Pina-D1a	Pinb-D1a	Pinb-B2a	TaSBEIII-T	GS-D1a	Hap-H	Hap-G	Hap-1	1599-A	1185-T	Hap-C	Hap-A	Hap-4A-C
151	DHARWADDRY	Rht-B1a	Rht-D1a	vrn-A1	vrn-B1	vrn-D1	Ppd-D1a	PH-2La	PH-4La	PH-5La	PH-6La	Rio Blanco type	Rio Blanco type	Sdr-B1a	Vp-1Bc	Jagger type	Zen type	Dreb-B1a	Lr14-	Lr34+	Lr68+	R5_Yr15+	R8_Yr15+	Fhb1_R	Fhb1+	1BL.1RS	Null	Glu-D1a	Pina-D1b	Pinb-D1a	Pinb-B2b	TaSBEIII-T	GS-D1a	Hap-H	Hap-A	Hap-1	1599-A	1185-C	Hap-C	Hap-G	Hap-4A-C
152	DTS1	Rht-B1a	Rht-D1b	vrn-A1	vrn-B1	Vrn-D1a	Ppd-D1b	PH-2Lb	PH-4Lb	PH-5Lb	PH-6Lb	NW97S186 type	NW97S186 type	Sdr-B1b	Vp-1Ba,b	CS type	CS/Jagger type	Dreb-B1b	Lr14-	Lr34-	Lr68+	R5_Yr15-	R8_Yr15+	Fhb1_R	Fhb1+	1BL.1RS	Null	Glu-D1a	Pina-D1a	Pinb-D1a	Pinb-B2b	TaSBEIII-C	GS-D1a	Hap-L	Hap-A	Hap-1	1599-A	1185-T	Hap-C	Hap-G	Hap-4A-C
153	KINGBIRD	Rht-B1b	Rht-D1b	Vrn-A1a	vrn-B1	Vrn-D1a	Ppd-D1b	PH-2Lb	PH-4Lb	PH-5Lb	PH-6Lb	NW97S186 type	NW97S186 type	Sdr-B1b	Vp-1Bc	CS type	Zen type	Dreb-B1b	Lr14-	Lr34-	Lr68+	R5_Yr15-	R8_Yr15-	Fhb1_R	Fhb1+	1BL.1RS	Null	Glu-D1a	Pina-D1b	Pinb-D1a	Pinb-B2a	TaSBEIII-T	GS-D1a	Hap-H	Hap-A	Hap-1	1599-A	1185-T	Hap-C	Hap-A	Hap-4A-C
154	DBW296	Rht-B1b	Rht-D1b	Vrn-A1a	vrn-B1	Vrn-D1a	Ppd-D1b	PH-2Lb	PH-4Lb	PH-5Lb	PH-6Lb	NW97S186 type	NW97S186 type	Sdr-B1b	Vp-1Bc	CS type	Zen type	Dreb-B1b	Lr14-	Lr34+	Lr68+	R5_Yr15-	R8_Yr15-	Fhb1_R	Fhb1+	1BL.1RS	Null	Glu-D1a	Pina-D1a	Pinb-D1a	Pinb-B2b	TaSBEIII-C	GS-D1a	Hap-H	Hap-A	Hap-1	1599-A	1185-T	Hap-C	Hap-G	Hap-4A-C
155	DTS8	Rht-B1b	Rht-D1b	Vrn-A1a	vrn-B1	Vrn-D1a	Ppd-D1b	PH-2Lb	PH-4Lb	PH-5Lb	PH-6Lb	NW97S186 type	NW97S186 type	Sdr-B1b	Vp-1Bc	CS type	Zen type	Dreb-B1b	Lr14-	Lr34-	Lr68+	R5_Yr15-	R8_Yr15-	Fhb1_R	Fhb1+	1BL.1RS	Null	Glu-D1a	Pina-D1b	Pinb-D1a	Pinb-B2b	TaSBEIII-C	GS-D1a	Hap-H	Hap-A	Hap-1	1599-A	1185-T	Hap-C	Hap-G	Hap-4A-C
156	K9351	Rht-B1b	Rht-D1b	vrn-A1	vrn-B1	Vrn-D1a	Ppd-D1b	PH-2Lb	PH-4Lb	PH-5Lb	PH-6Lb	NW97S186 type	NW97S186 type	Sdr-B1b	Vp-1Bc	CS type	Zen type	Dreb-B1b	Lr14+	Lr34-	Lr68+	R5_Yr15-	R8_Yr15-	Fhb1_R	Fhb1+	1BL.1RS	Null	Glu-D1a	Pina-D1b	Pinb-D1b	Pinb-B2b	TaSBEIII-C	GS-D1a	Hap-H	Hap-G	Hap-1	1599-A	1185-T	Hap-T	Hap-G	Hap-4A-C
157	HD2009	Rht-B1b	Rht-D1a	vrn-A1	vrn-B1	Vrn-D1a	Ppd-D1b	PH-2Lb	PH-4Lb	PH-5Lb	PH-6Lb	Rio Blanco type	Rio Blanco type	Sdr-B1b	Vp-1Ba,b	CS type	CS/Jagger type	Dreb-B1b	Lr14+	Lr34+	Lr68+	R5_Yr15-	R8_Yr15-	Fhb1_R	Fhb1+	1BL.1RS	Null	Glu-D1a	Pina-D1b	Pinb-D1b	Pinb-B2b	TaSBEIII-T	GS-D1a	Hap-H	Hap-G	Hap-1	1599-A	1185-T	Hap-C	Hap-G	Hap-4A-C
158	DBW372	Rht-B1b	Rht-D1b	vrn-A1	vrn-B1	Vrn-D1a	Ppd-D1b	PH-2Lb	PH-4Lb	PH-5Lb	PH-6Lb	NW97S186 type	NW97S186 type	Sdr-B1b	Vp-1Bc	CS type	Zen type	Dreb-B1b	Lr14+	Lr34+	Lr68+	R5_Yr15-	R8_Yr15-	Fhb1_R	Fhb1+	1BL.1RS	Null	Glu-D1a	Pina-D1b	Pinb-D1a	Pinb-B2b	TaSBEIII-C	GS-D1a	Hap-H	Hap-G	Hap-1	1599-A	1185-C	Hap-C	Hap-G	Hap-4A-C
159	HD2329	Rht-B1b	Rht-D1b	Vrn-A1a	vrn-B1	Vrn-D1a	Ppd-D1b	PH-2Lb	PH-4Lb	PH-5Lb	PH-6Lb	NW97S186 type	NW97S186 type	Sdr-B1a	Vp-1Ba,b	CS type	CS/Jagger type	Dreb-B1b	Lr14+	Lr34+	Lr68+	R5_Yr15-	R8_Yr15+	Fhb1_R	Fhb1-	1BL.1RS	Null	Glu-D1a	Pina-D1b	Pinb-D1a	Pinb-B2b	TaSBEIII-C	GS-D1a	Hap-L	Hap-G	Hap-1	1599-A	1185-T	Hap-T	Hap-G	Hap-4A-C
160	IC212161	Rht-B1b	Rht-D1b	vrn-A1	vrn-B1	vrn-D1	Ppd-D1b	PH-2Lb	PH-4Lb	PH-5Lb	PH-6Lb	NW97S186 type	NW97S186 type	Sdr-B1a	Vp-1Bc	CS type	Zen type	Dreb-B1b	Lr14-	Lr34-	Lr68+	R5_Yr15-	R8_Yr15+	Fhb1_R	Fhb1+	1BL.1RS	Null	Glu-D1a	Pina-D1b	Pinb-D1a	Pinb-B2b	TaSBEIII-T	GS-D1a	Hap-L	Hap-G	Hap-1	1599-A	1185-T	Hap-C	Hap-G	Hap-4A-C
161	UP2303	Rht-B1b	Rht-D1b	vrn-A1	vrn-B1	vrn-D1	Ppd-D1b	PH-2Lb	PH-4Lb	PH-5Lb	PH-6Lb	NW97S186 type	NW97S186 type	Sdr-B1b	Vp-1Bc	CS type	Zen type	Dreb-B1b	Lr14-	Lr34+	Lr68+	R5_Yr15-	R8_Yr15-	Fhb1_R	Fhb1+	1BL.1BL	Null	Glu-D1a	Pina-D1b	Pinb-D1b	Pinb-B2b	TaSBEIII-T	GS-D1a	Hap-L	Hap-G	Hap-1	1599-A	1185-C	Hap-C	Hap-G	Hap-4A-C
162	LGM132	Rht-B1a	Rht-D1a	vrn-A1	vrn-B1	Vrn-D1a	Ppd-D1a	PH-2Lb	PH-4Lb	PH-5Lb	PH-6Lb	NW97S186 type	NW97S186 type	Sdr-B1a	Vp-1Ba,b	CS type	CS/Jagger type	Dreb-B1b	Lr14-	Lr34+	Lr68+	R5_Yr15-	R8_Yr15+	Fhb1_R	Fhb1-	1BL.1RS	Ax1 or Ax2*	Glu-D1a	Pina-D1a	Pinb-D1a	Pinb-B2b	TaSBEIII-T	GS-D1a	Hap-L	Hap-G	Hap-1	1599-A	1185-C	Hap-C	Hap-A	Hap-4A-C
163	DBW273	Rht-B1a	Rht-D1b	Vrn-A1a	Vrn-B1b	Vrn-D1a	Ppd-D1b	PH-2Lb	PH-4Lb	PH-5Lb	PH-6Lb	NW97S186 type	NW97S186 type	Sdr-B1a	Vp-1Ba,b	CS type	CS/Jagger type	Dreb-B1b	Lr14+	Lr34+	Lr68+	R5_Yr15-	R8_Yr15-	Fhb1_R	Fhb1-	1BL.1BL	Null	Glu-D1a	Pina-D1b	Pinb-D1a	Pinb-B2b	TaSBEIII-C	GS-D1a	Hap-H	Hap-A	Hap-1	1599-A	1185-C	Hap-C	Hap-A	Hap-4A-C
164	DBW88	Rht-B1b	Rht-D1b	vrn-A1	Vrn-B1b	Vrn-D1a	Ppd-D1b	PH-2Lb	PH-4Lb	PH-5Lb	PH-6Lb	NW97S186 type	NW97S186 type	Sdr-B1b	Vp-1Bc	CS type	Zen type	Dreb-B1b	Lr14-	Lr34-	Lr68+	R5_Yr15-	R8_Yr15-	Fhb1_R	Fhb1+	1BL.1RS	Null	Glu-D1a	Pina-D1b	Pinb-D1a	Pinb-B2b	TaSBEIII-C	GS-D1a	Hap-H	Hap-A	Hap-1	1599-A	1185-C	Hap-C	Hap-A	Hap-4A-C
165	DBW332	Rht-B1b	Rht-D1b	vrn-A1	Vrn-B1b	Vrn-D1a	Ppd-D1b	PH-2Lb	PH-4Lb	PH-5Lb	PH-6Lb	NW97S186 type	NW97S186 type	Sdr-B1b	Vp-1Bc	CS type	Zen type	Dreb-B1b	Lr14-	Lr34+	Lr68+	R5_Yr15-	R8_Yr15-	Fhb1_R	Fhb1+	1BL.1RS	Null	Glu-D1a	Pina-D1b	Pinb-D1a	Pinb-B2b	TaSBEIII-C	GS-D1a	Hap-H	Hap-G	Hap-1	1599-A	1185-T	Hap-C	Hap-A	Hap-4A-C
166	WH1402	Rht-B1b	Rht-D1b	vrn-A1	Vrn-B1b	Vrn-D1a	Ppd-D1b	PH-2Lb	PH-4Lb	PH-5Lb	PH-6Lb	NW97S186 type	NW97S186 type	Sdr-B1b	Vp-1Bc	CS type	Zen type	Dreb-B1b	Lr14-	Lr34+	Lr68+	R5_Yr15-	R8_Yr15-	Fhb1_R	Fhb1+	1BL.1RS	Null	Glu-D1a	Pina-D1b	Pinb-D1b	Pinb-B2a	TaSBEIII-C	GS-D1a	Hap-H	Hap-G	Hap-1	1599-A	1185-C	Hap-C	Hap-G	Hap-4A-C
167	BWL9022	Rht-B1b	Rht-D1b	vrn-A1	Vrn-B1b	vrn-D1	Ppd-D1b	PH-2Lb	PH-4Lb	PH-5Lb	PH-6Lb	NW97S186 type	NW97S186 type	Sdr-B1b	Vp-1Bc	CS type	Zen type	Dreb-B1b	Lr14-	Lr34-	Lr68+	R5_Yr15-	R8_Yr15-	Fhb1_R	Fhb1+	1BL.1RS	Null	Glu-D1a	Pina-D1b	Pinb-D1b	Pinb-B2b	TaSBEIII-C	GS-D1a	Hap-H	Hap-G	Hap-1	1599-A	1185-T	Hap-C	Hap-A	Hap-4A-C
168	IC296440	Rht-B1b	Rht-D1b	vrn-A1	Vrn-B1b	vrn-D1	Ppd-D1b	PH-2Lb	PH-4Lb	PH-5Lb	PH-6Lb	NW97S186 type	NW97S186 type	Sdr-B1b	Vp-1Bc	CS type	Zen type	Dreb-B1b	Lr14+	Lr34+	Lr68+	R5_Yr15-	R8_Yr15-	Fhb1_R	Fhb1+	1BL.1RS	Null	Glu-D1a	Pina-D1b	Pinb-D1a	Pinb-B2a	TaSBEIII-C	GS-D1a	Hap-H	Hap-A	Hap-1	1599-A	1185-T	Hap-C	Hap-G	Hap-4A-C
169	SQ1	Rht-B1b	Rht-D1b	vrn-A1	Vrn-B1b	vrn-D1	Ppd-D1b	PH-2Lb	PH-4Lb	PH-5Lb	PH-6Lb	NW97S186 type	NW97S186 type	Sdr-B1b	Vp-1Bc	CS type	Zen type	Dreb-B1b	Lr14+	Lr34-	Lr68+	R5_Yr15-	R8_Yr15-	Fhb1_R	Fhb1+	1BL.1RS	Null	Glu-D1a	Pina-D1a	Pinb-D1a	Pinb-B2b	TaSBEIII-C	GS-D1a	Hap-H	Hap-A	Hap-1	1599-A	1185-C	Hap-C	Hap-G	Hap-4A-C
170	LGM245	Rht-B1a	Rht-D1b	Vrn-A1a	Vrn-B1b	Vrn-D1a	Ppd-D1a	PH-2Lb	PH-4Lb	PH-5Lb	PH-6Lb	NW97S186 type	NW97S186 type	Sdr-B1a	Vp-1Ba,b	CS type	CS/Jagger type	Dreb-B1b	Lr14-	Lr34+	Lr68+	R5_Yr15-	R8_Yr15-	Fhb1_R	Fhb1-	1BL.1BL	Ax1 or Ax2*	Glu-D1a	Pina-D1a	Pinb-D1a	Pinb-B2b	TaSBEIII-T	GS-D1a	Hap-H	Hap-A	Hap-1	1599-A	1185-T	Hap-C	Hap-A	Hap-4A-C
171	LGM134-B	Rht-B1b	Rht-D1b	Vrn-A1a	Vrn-B1b	Vrn-D1a	Ppd-D1a	PH-2Lb	PH-4Lb	PH-5Lb	PH-6Lb	NW97S186 type	NW97S186 type	Sdr-B1b	Vp-1Bc	CS type	Zen type	Dreb-B1b	Lr14-	Lr34+	Lr68+	R5_Yr15-	R8_Yr15-	Fhb1_R	Fhb1+	1BL.1RS	Null	Glu-D1a	Pina-D1b	Pinb-D1a	Pinb-B2b	TaSBEIII-T	GS-D1a	Hap-H	Hap-G	Hap-1	1599-T	1185-T	Hap-T	Hap-A	Hap-4A-C
172	RIL116	Rht-B1b	Rht-D1b	vrn-A1	Vrn-B1b	Vrn-D1a	Ppd-D1a	PH-2Lb	PH-4Lb	PH-5Lb	PH-6Lb	NW97S186 type	NW97S186 type	Sdr-B1b	Vp-1Bc	CS type	Zen type	Dreb-B1b	Lr14+	Lr34-	Lr68+	R5_Yr15-	R8_Yr15-	Fhb1_R	Fhb1+	1BL.1RS	Null	Glu-D1a	Pina-D1b	Pinb-D1a	Pinb-B2b	TaSBEIII-C	GS-D1a	Hap-H	Hap-A	Hap-1	1599-A	1185-C	Hap-C	Hap-A	Hap-4A-C
173	NB29-6-2-12	Rht-B1b	Rht-D1b	vrn-A1	Vrn-B1b	Vrn-D1a	Ppd-D1a	PH-2Lb	PH-4Lb	PH-5Lb	PH-6Lb	NW97S186 type	NW97S186 type	Sdr-B1b	Vp-1Bc	CS type	Zen type	Dreb-B1b	Lr14+	Lr34+	Lr68+	R5_Yr15-	R8_Yr15-	Fhb1_R	Fhb1+	1BL.1RS	Ax1 or Ax2*	Glu-D1a	Pina-D1a	Pinb-D1a	Pinb-B2b	TaSBEIII-C	GS-D1a	Hap-H	Hap-G	Hap-1	1599-A	1185-T	Hap-C	Hap-A	Hap-4A-C
174	C306	Rht-B1b	Rht-D1b	vrn-A1	Vrn-B1b	vrn-D1	Ppd-D1a	PH-2Lb	PH-4Lb	PH-5Lb	PH-6Lb	NW97S186 type	NW97S186 type	Sdr-B1b	Vp-1Bc	CS type	Zen type	Dreb-B1b	Lr14-	Lr34+	Lr68+	R5_Yr15-	R8_Yr15-	Fhb1_R	Fhb1+	1BL.1RS	Ax1 or Ax2*	Glu-D1a	Pina-D1b	Pinb-D1a	Pinb-B2b	TaSBEIII-C	GS-D1a	Hap-H	Hap-A	Hap-1	1599-A	1185-T	Hap-C	Hap-A	Hap-4A-C
175	IC321886	Rht-B1a	Rht-D1a	vrn-A1	Vrn-B1b	vrn-D1	Ppd-D1a	PH-2Lb	PH-4Lb	PH-5Lb	PH-6Lb	NW97S186 type	NW97S186 type	Sdr-B1b	Vp-1Bc	CS type	Zen type	Dreb-B1b	Lr14+	Lr34+	Lr68+	R5_Yr15-	R8_Yr15-	Fhb1_R	Fhb1-	1BL.1RS	Null	Glu-D1a	Pina-D1b	Pinb-D1a	Pinb-B2b	TaSBEIII-T	GS-D1a	Hap-H	Hap-A	Hap-1	1599-A	1185-T	Hap-C	Hap-A	Hap-4A-C
176	SB20	Rht-B1b	Rht-D1b	vrn-A1	Vrn-B1b	Vrn-D1a	Ppd-D1b	PH-2Lb	PH-4Lb	PH-5Lb	PH-6Lb	NW97S186 type	NW97S186 type	Sdr-B1a	Vp-1Bc	CS type	Zen type	Dreb-B1b	Lr14-	Lr34+	Lr68+	R5_Yr15-	R8_Yr15-	Fhb1_R	Fhb1+	1BL.1RS	Null	Glu-D1a	Pina-D1b	Pinb-D1a	Pinb-B2b	TaSBEIII-T	GS-D1a	Hap-L	Hap-G	Hap-1	1599-A	1185-T	Hap-C	Hap-G	Hap-4A-C
177	BNI BORLAUG	Rht-B1b	Rht-D1b	vrn-A1	Vrn-B1b	Vrn-D1a	Ppd-D1b	PH-2Lb	PH-4Lb	PH-5Lb	PH-6Lb	NW97S186 type	NW97S186 type	Sdr-B1a	Vp-1Ba,b	CS type	Zen type	Dreb-B1b	Lr14-	Lr34+	Lr68+	R5_Yr15-	R8_Yr15+	Fhb1_R	Fhb1+	1BL.1RS	Null	Glu-D1a	Pina-D1b	Pinb-D1a	Pinb-B2b	TaSBEIII-C	GS-D1a	Hap-L	Hap-A	Hap-1	1599-A	1185-T	Hap-C	Hap-G	Hap-4A-C
178	BH1146	Rht-B1a	Rht-D1b	vrn-A1	Vrn-B1b	vrn-D1	Ppd-D1b	PH-2Lb	PH-4Lb	PH-5Lb	PH-6Lb	NW97S186 type	Rio Blanco type	Sdr-B1a	Vp-1Ba,b	CS type	Zen type	Dreb-B1b	Lr14+	Lr34-	Lr68+	R5_Yr15-	R8_Yr15+	Fhb1_R	Fhb1-	1BL.1RS	Null	Glu-D1a	Pina-D1a	Pinb-D1a	Pinb-B2b	TaSBEIII-T	GS-D1a	Hap-L	Hap-A	Hap-1	1599-A	1185-T	Hap-C	Hap-G	Hap-4A-C
Note: Yellow colour indicates the favourable alleles.
