# Supplementary material for: Functional gene diversity and zone-targeted genotype prioritization using trait-diagnostic KASP markers in bread wheat (Triticum aestivum L.)
Source: Research Square preprint supplement (doi:10.21203/rs.3.rs-8710524/v1), 2026-02-20
Supplement: Supplementary file 4 [file caed036277b50f44484dc426.docx]

**Supplementary Table** **S2** Zone-wise trait weightings (%) used for functional-allele-based genotype scoring across the five Indian wheat production zones.

| **Trait** | **NWPZ** | **NEPZ** | **CZ** | **PZ** | **NHZ** |
| --- | --- | --- | --- | --- | --- |
| Dwarfing | 8 | 7 | 2 | 1 | 2 |
| Vernalisation | 3 | 5 | 2 | 0 | 22 |
| Photoperiod sensitivity | 6 | 11 | 14 | 15 | 10 |
| Pre-harvest sprouting | 3 | 11 | 4 | 4 | 1 |
| Drought tolerance | 2 | 18 | 28 | 34 | 0 |
| Leaf rust resistance | 12 | 9 | 7 | 6 | 10 |
| Stripe rust resistance | 22 | 9 | 6 | 8 | 20 |
| Fusarium head blight (FHB) resistance | 1 | 1 | 1 | 0 | 1 |
| Rye translocation | 1 | 2 | 1 | 0 | 0 |
| Gluten strength | 6 | 6 | 6 | 4 | 5 |
| Grain hardness | 6 | 5 | 8 | 5 | 5 |
| Grain weight | 10 | 7 | 9 | 10 | 8 |
| Grain weight and length | 3 | 3 | 2 | 1 | 3 |
| No. of spikelets/spike | 3 | 3 | 2 | 2 | 4 |
| Grain width | 3 | 3 | 2 | 1 | 3 |
| Thousand kernel weight | 11 | 2 | 8 | 8 | 8 |
