# Supplementary material for: Functional gene diversity and zone-targeted genotype prioritization using trait-diagnostic KASP markers in bread wheat (Triticum aestivum L.)
Source: Research Square preprint supplement (doi:10.21203/rs.3.rs-8710524/v1), 2026-02-20
Supplement: Supplementary file 5 [file d20ab119c8a096aecd844a9c.docx]

**Table 3** Zone-wise prioritization scores and top five wheat genotypes based on zone-specific relative breeding priorities of evaluated traits.

| **S. No.** | **Zone** | **Criteria (ordered according to the zone-wise relative breeding priority of the evaluated traits)** | **Genotype** | **Score** |
| --- | --- | --- | --- | --- |
| 1 | NWPZ | Stripe rust resistance; Leaf rust resistance; Grain yield; Reduced height; Photoperiod sensitivity; Grain quality; Vernalization; Pre-harvest sprouting; Drought tolerance; Fusarium head blight resistance | PBW723 | 75.8 |
| 2 | HD2967 | 73.6 |
| 3 | VL798 | 72.9 |
| 4 | D127 | 72.1 |
| 5 | DBW371 | 64.9 |
| 6 | PZ | Drought tolerance; Photoperiod sensitivity; Grain yield; Stripe rust resistance; Leaf rust resistance; Grain quality; Pre-harvest sprouting; Reduced height; Vernalization; Fusarium head blight | DHARWADDRY | 83.0 |
| 7 | FLW13 | 77.8 |
| 8 | PNBW596 | 76.0 |
| 9 | W485 | 75.8 |
| 10 | MACS6222 | 75.2 |
| 11 | NHZ | Vernalization; Stripe rust resistance; Photoperiod sensitivity; Leaf rust resistance; Grain yield; Reduced height; Pre-harvest sprouting; Fusarium head blight resistance; Grain quality; Drought tolerance | IC321998 | 75.0 |
| 12 | IC322007A | 73.3 |
| 13 | NP846 | 73.1 |
| 14 | IC322001 | 72.9 |
| 15 | HPW349 | 68.3 |
| 16 | NEPZ | Drought tolerance; Photoperiod sensitivity; Pre-harvest sprouting; Leaf rust; Stripe rust; Grain quality; Grain yield; Reduced height; Vernalization; Fusarium head blight resistance | HD2888 | 72.2 |
| 17 | FLW5 | 70.8 |
| 18 | MBL5 | 66.5 |
| 19 | HD3118 | 66.3 |
| 20 | NW1014 | 66.2 |
| 21 | CZ | Drought tolerance; Photoperiod sensitivity; Grain yield; Grain quality; Leaf rust resistance; Stripe rust resistance; Pre-harvest sprouting; Reduced height; Vernalisation; Fusarium head blight resistance | NARMADA4 | 72.3 |
| 22 | HINDI62 | 72.2 |
| 23 | HI1500 | 72.0 |
| 24 | NB29-13-5-9 | 68.6 |
| 25 | KBRL10 | 68.3 |
